# Supplementary material for: Synthesis, photophysical and electrochemical properties of novel and highly fluorescent difluoroboron flavanone β-diketonate complexes
Source: Royal Society of Chemistry journal article supplement (doi:10.1039/d0nj03525d), 2020-01-01
Supplement: d0nj03525d1.pdf [file d0nj03525d1.pdf]

## Synthesis, Photophysical and Electrochemical Properties of Novel and Highly Fluorescent Difluoroboron Flavanone $\beta$ -Diketonate Complexes

Elida Betania Ariza Paez<sup>a</sup>, Sergio Curcio<sup>b</sup>, Natália P. Neme<sup>bc</sup>, Matheus J.S. Matos<sup>b</sup>, Rodrigo S. Correa<sup>a</sup>, Fabio Junio Pereira<sup>a</sup>, Flaviane Francisco Hilário<sup>a</sup>, Thiago Cazati<sup>b</sup> and Jason Guy Taylor<sup>a</sup>

<sup>a</sup> Chemistry Department, ICEB, Federal University of Ouro Preto, Campus Universitário Morro do Cruzeiro, 35400-000, Ouro Preto-MG, Brazil.

<sup>b</sup> Physics Department, ICEB, Federal University of Ouro Preto, Campus Universitário Morro do Cruzeiro, 35400-000, Ouro Preto-MG, Brazil.

<sup>c</sup> University of Groningen, Zernike Institute for Advanced Materials, Nijenborgh 4, 9747 AG Groningen, The Netherlands

\* e-mail address of the corresponding author: [jason@iceb.ufop.br](mailto:jason@iceb.ufop.br) or [jason@ufop.edu.br](mailto:jason@ufop.edu.br)

### Synthesis of Compounds 4a-i

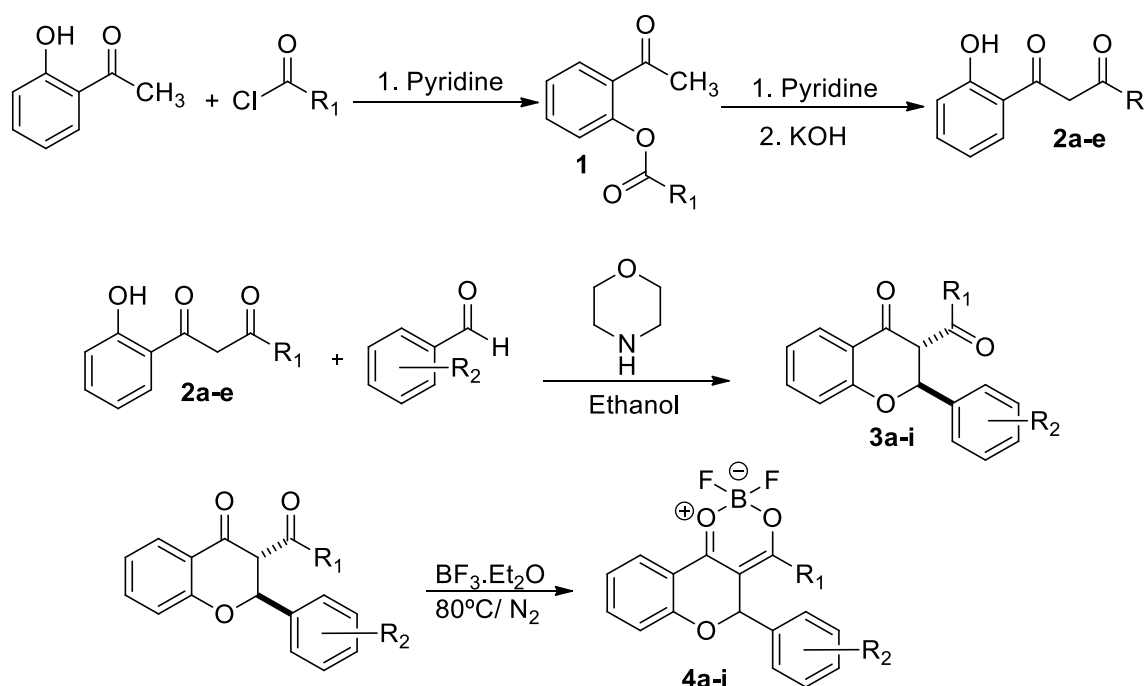

**Scheme 1.** Synthesis of Difluoroboron Flavanone  $\beta$ -Diketonate Complexes 4a-i

The FTIR (ATR), IR spectrum calculated with B3LYP functional,  $^1\text{H}$  NMR (400 MHz) and  $^{13}\text{C}$  NMR (100 MHz) spectra of Compound **4a** in  $\text{CDCl}_3$

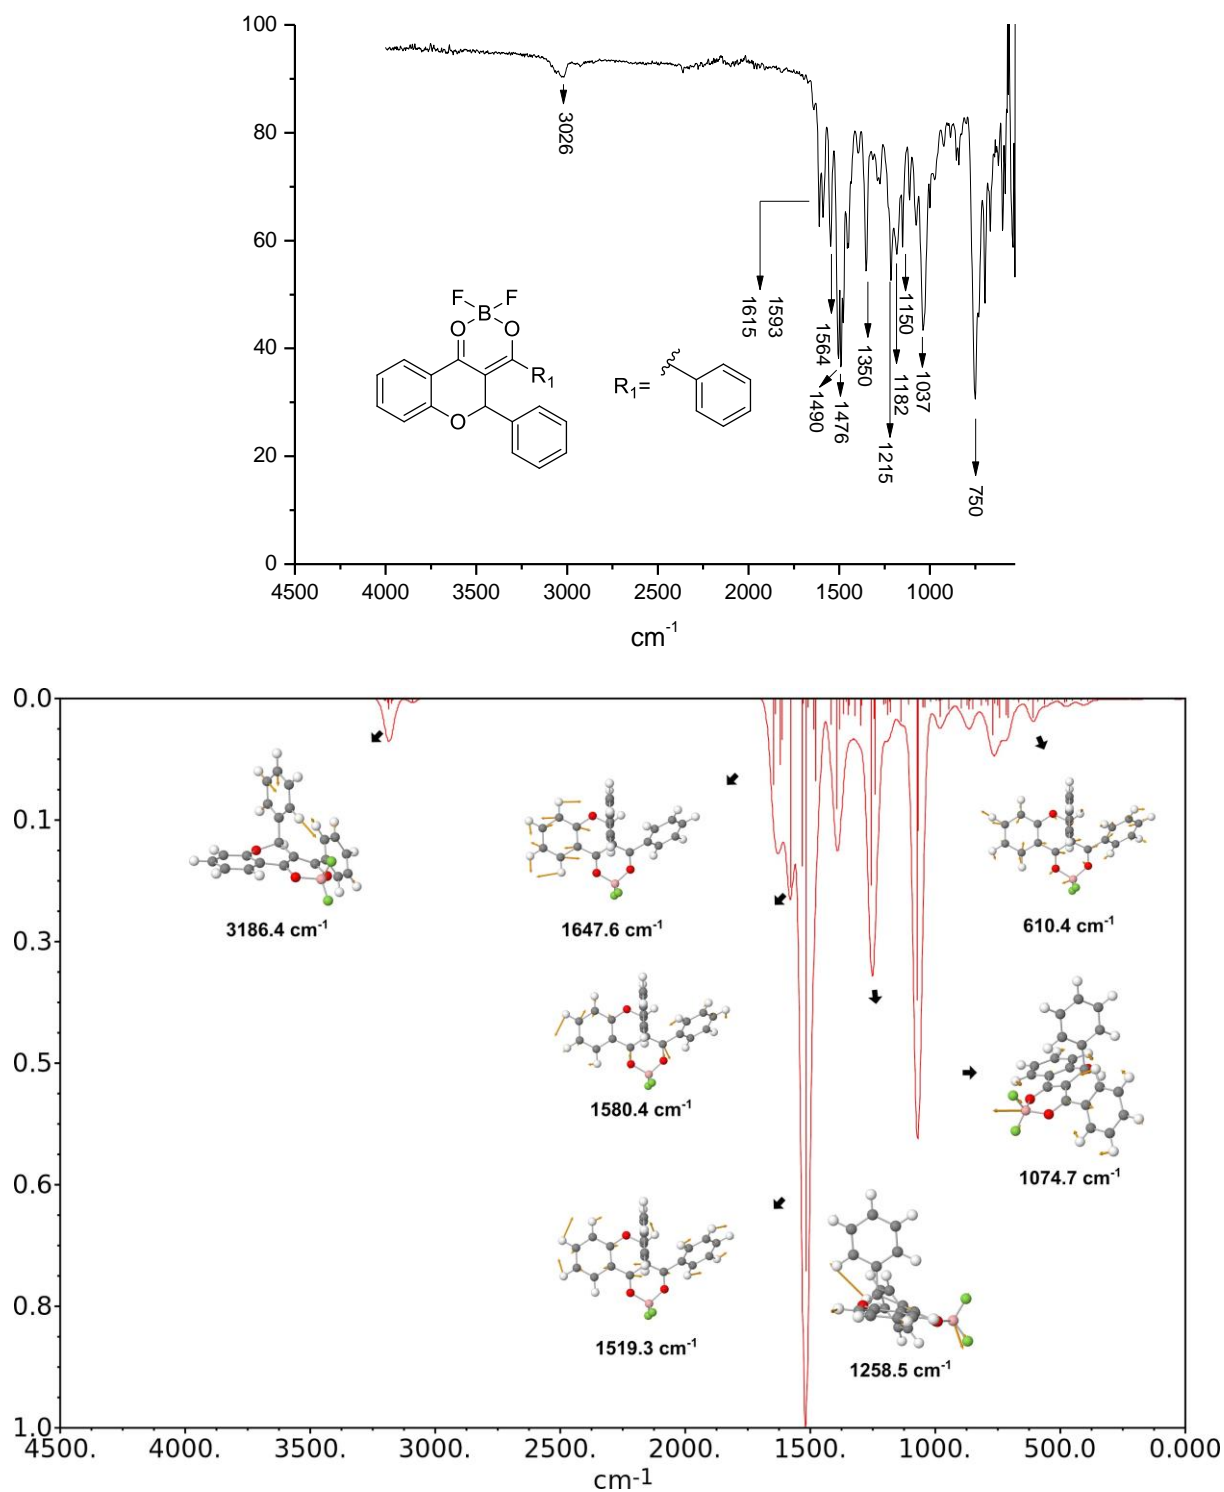

**Figure 1S.** Infrared spectra of compound **4a** (ATR) and IR spectrum with the main vibration normal modes for compound **4a** calculated with B3LYP functional.

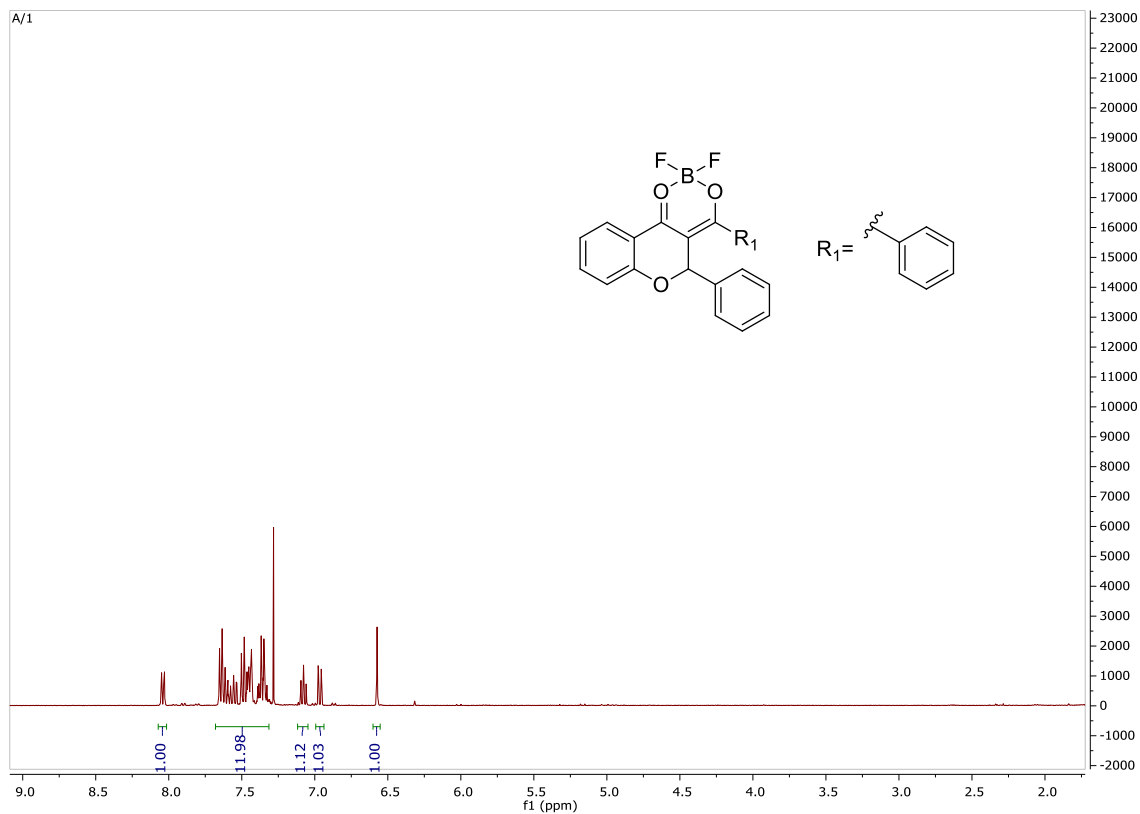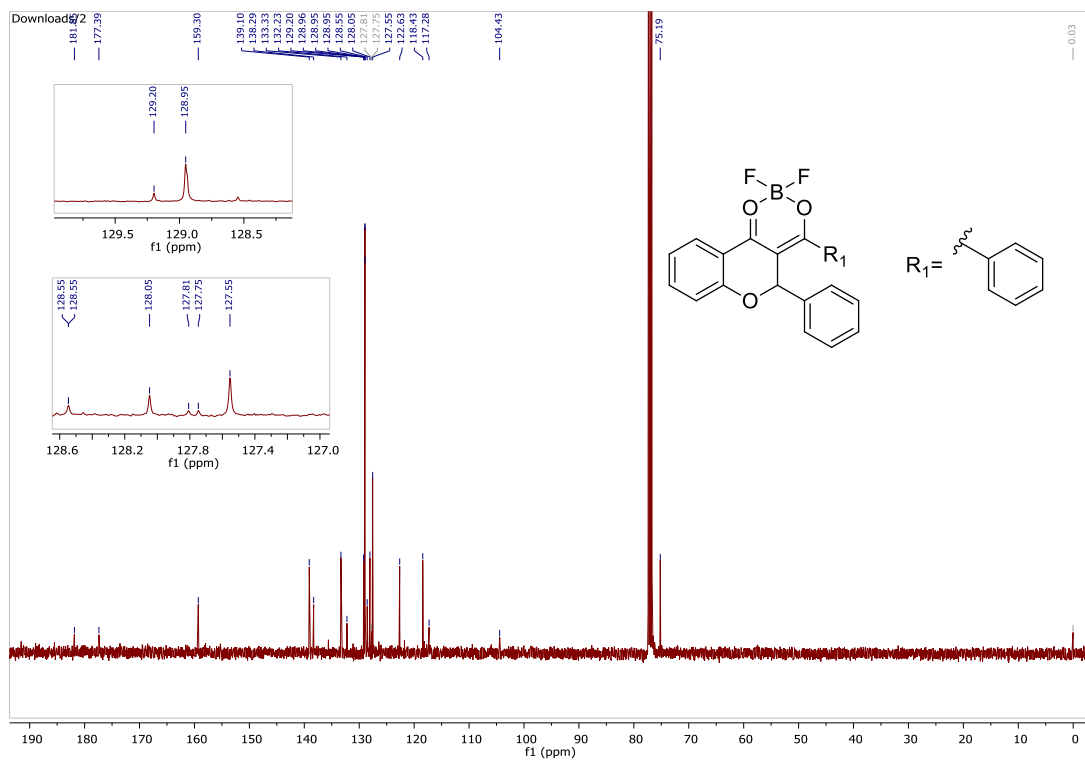

The FTIR (ATR),  $^1\text{H}$  NMR (400 MHz) and  $^{13}\text{C}$  NMR (100 MHz) spectra of Compound **4b** in  $\text{CDCl}_3$

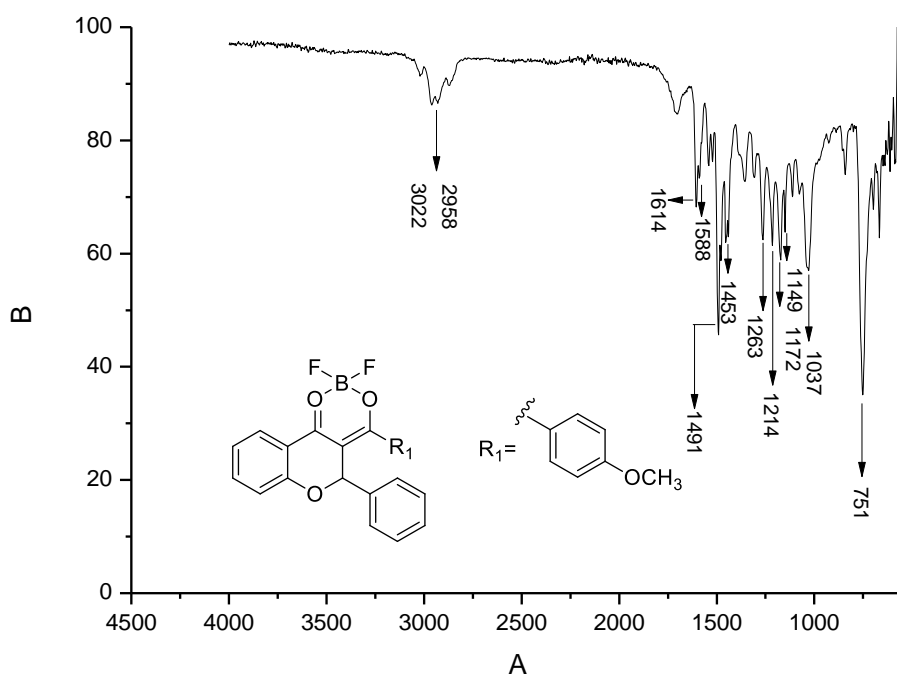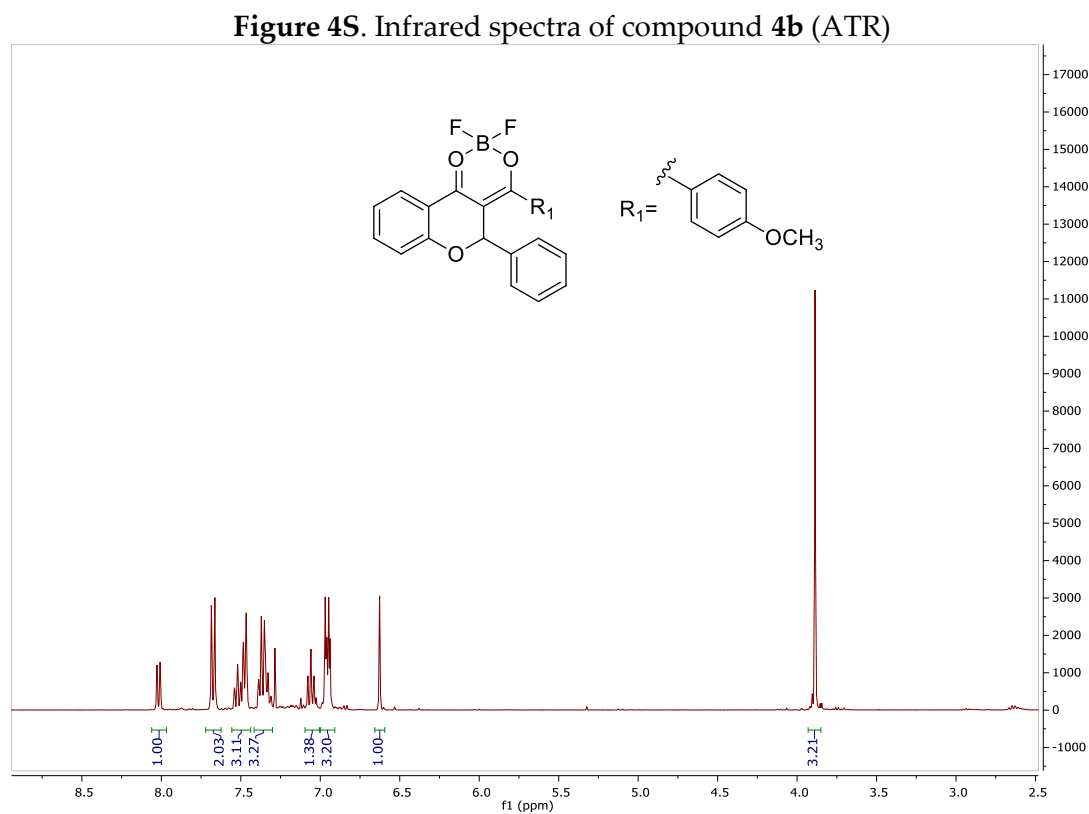

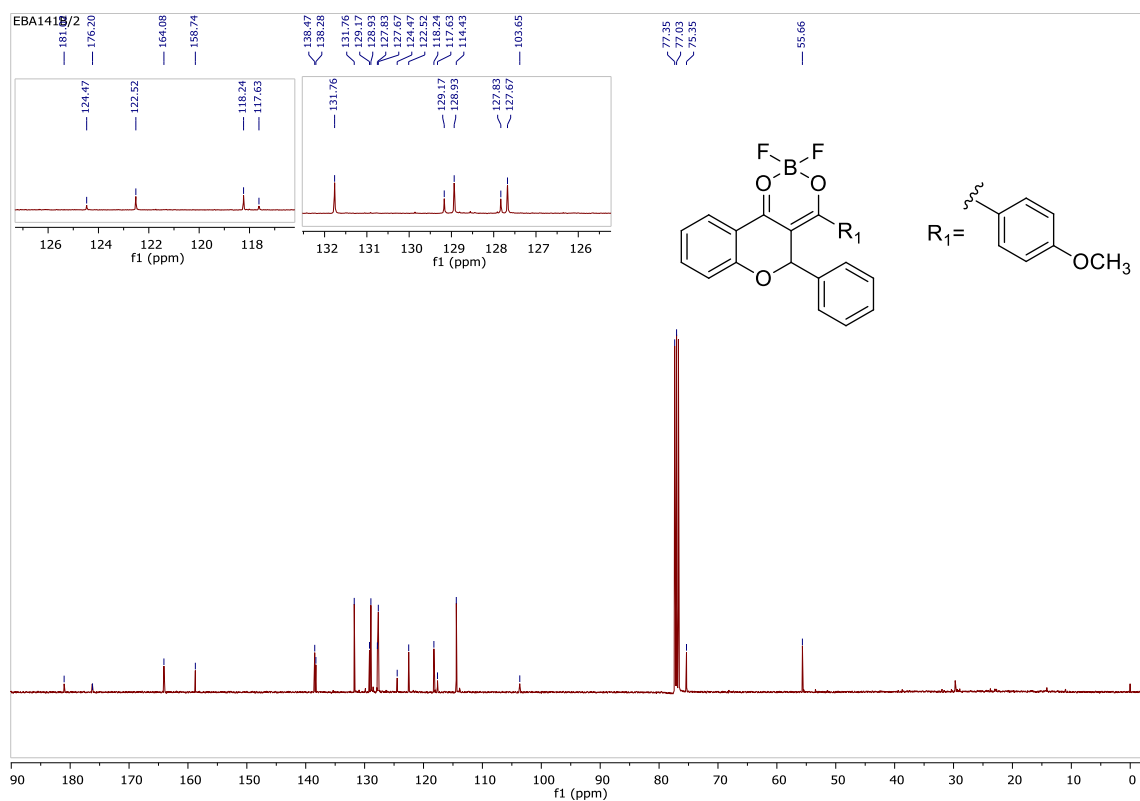

**Figure 6S.** NMR  $^{13}\text{C}$  spectra of compound **4b** ( $\text{CDCl}_3$ , 100 MHz)

The FTIR (ATR), <sup>1</sup>H NMR (400 MHz) and <sup>13</sup>C NMR (100 MHz) spectra of Compound **4c** in CDCl<sub>3</sub>

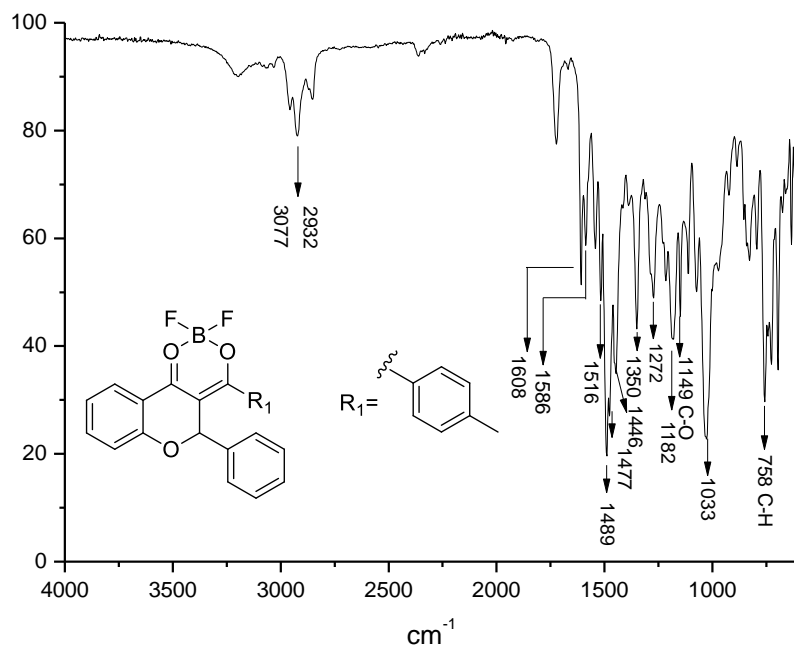

**Figure 7S.** Infrared spectra of compound **4c** (ATR)

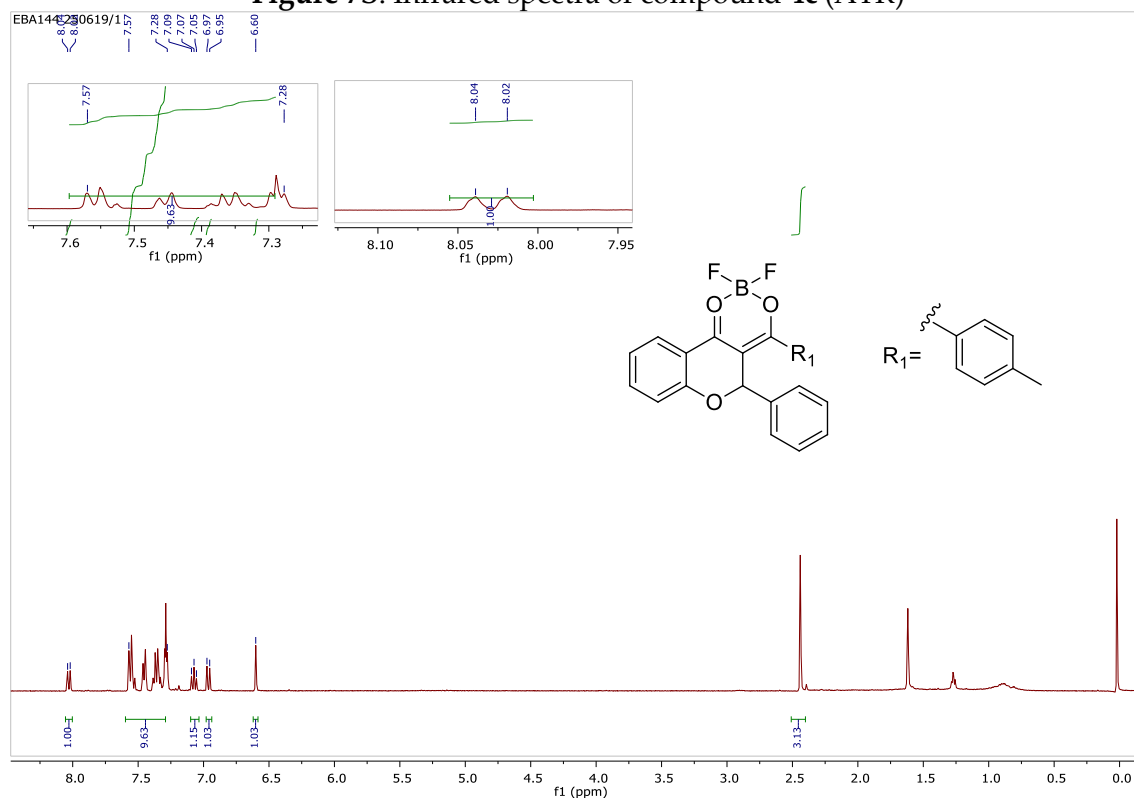

**Figure 8S.** NMR <sup>1</sup>H spectra of compound **4c** (CDCl<sub>3</sub>, 400 MHz)

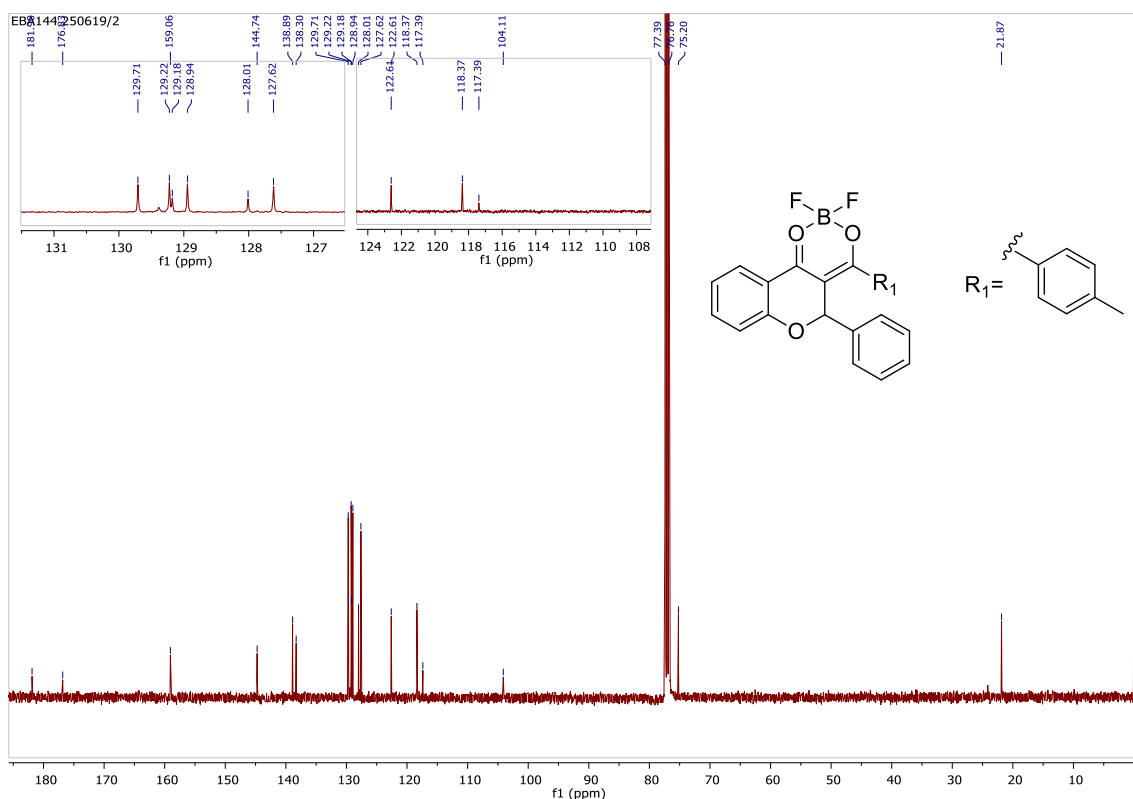

The FTIR (ATR),  $^1\text{H}$  NMR (400 MHz) and  $^{13}\text{C}$  NMR (100 MHz) spectra of Compound **4d** in  $\text{CDCl}_3$

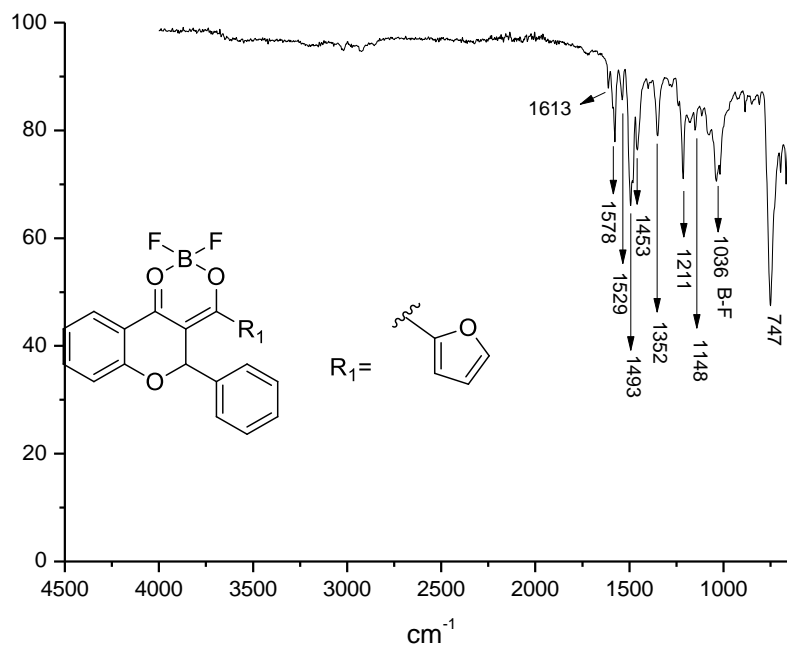

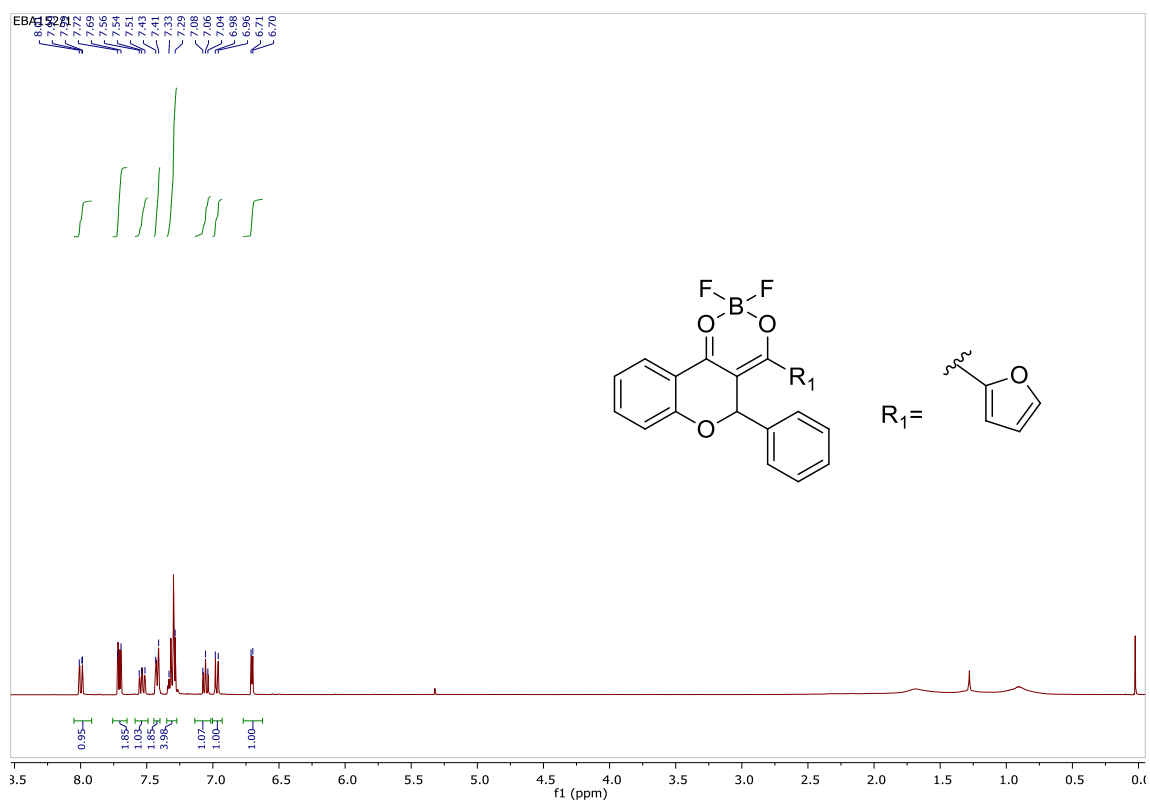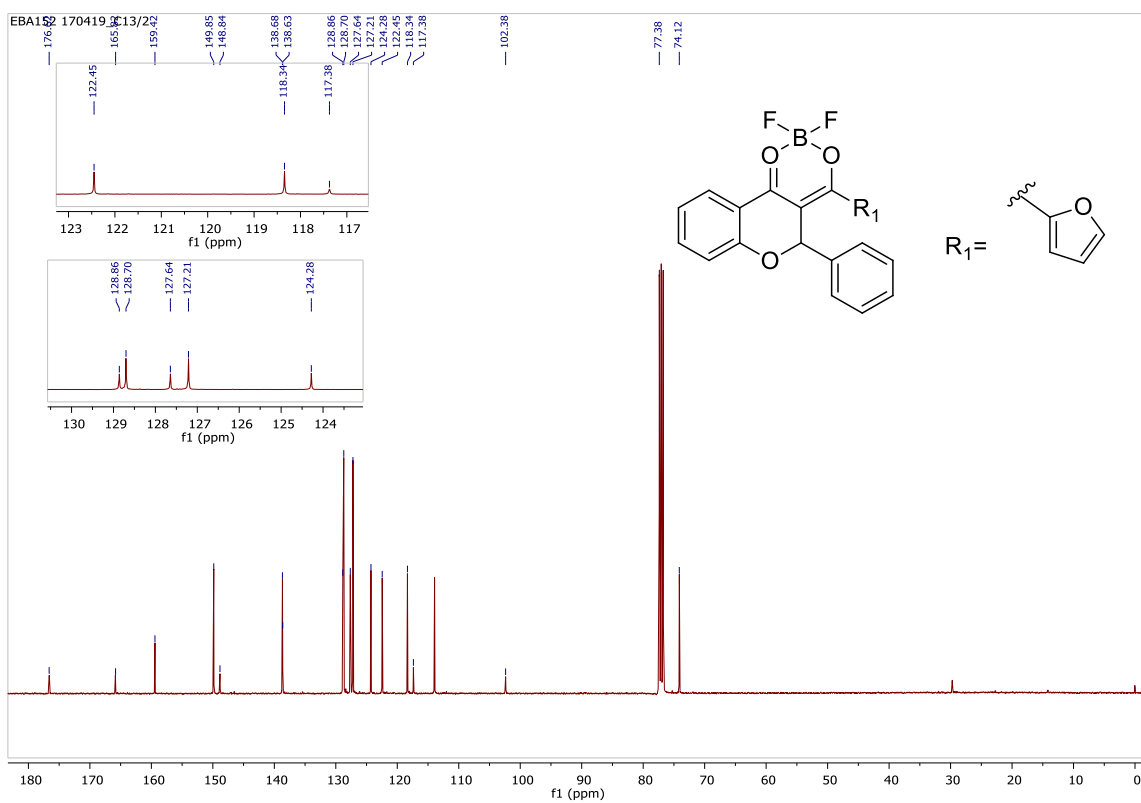



The FTIR (ATR),  $^1\text{H}$  NMR (400 MHz) and  $^{13}\text{C}$  NMR (100 MHz) spectra of Compound **4e** in  $\text{CDCl}_3$

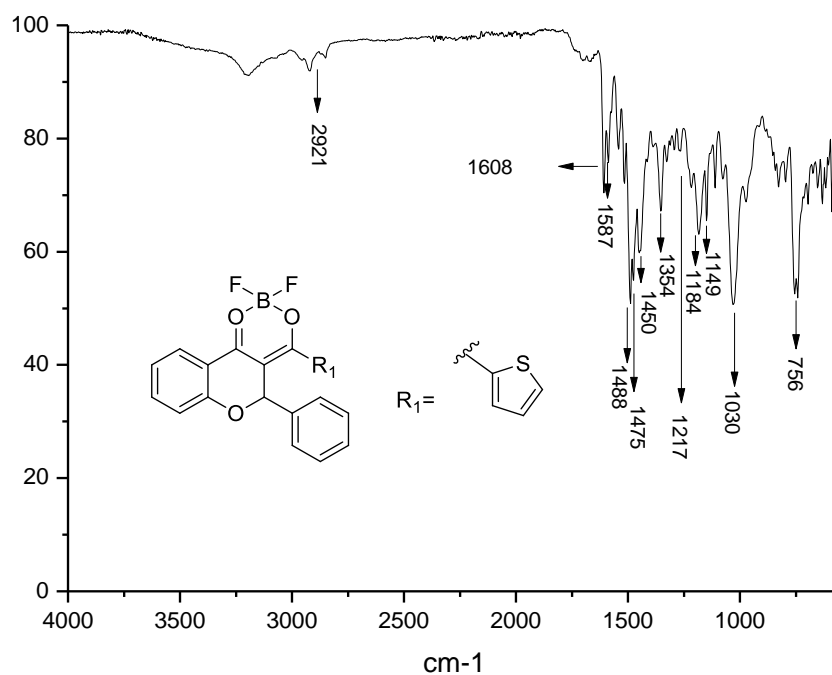

Figure 13S. Infrared spectra of compound **4e** (ATR)

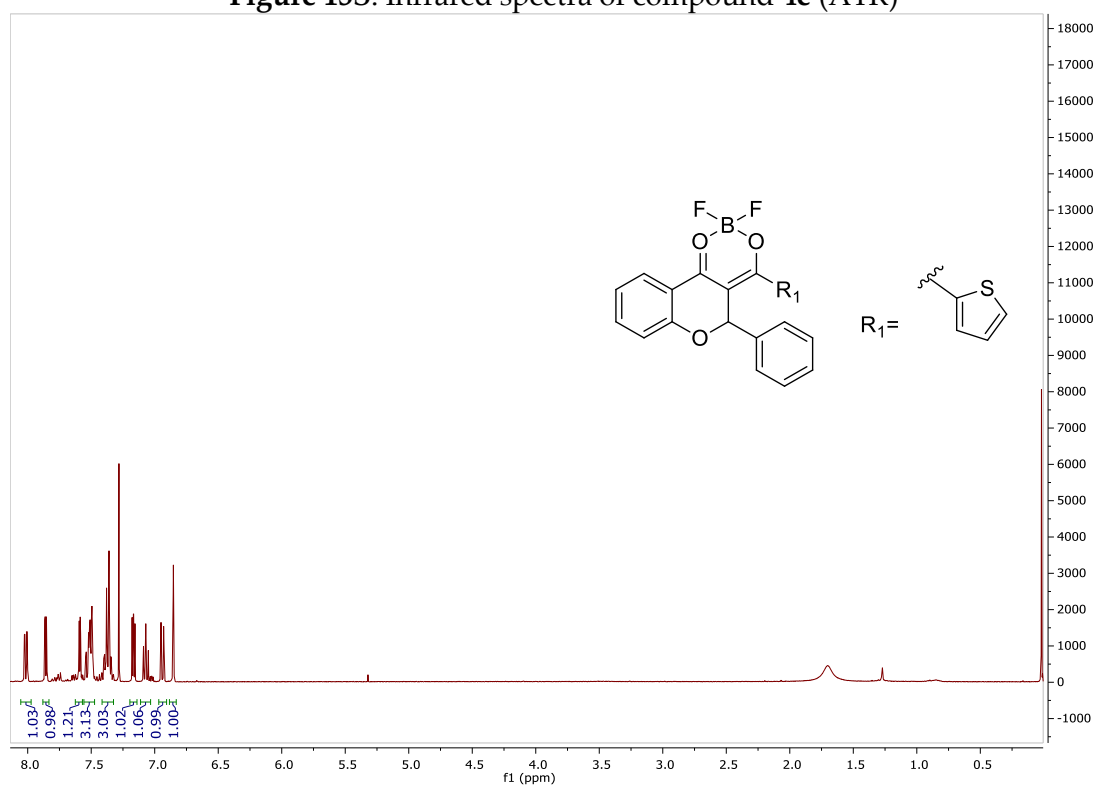

Figure 14S. NMR  $^1\text{H}$  spectra of compound **4e** ( $\text{CDCl}_3$ , 400 MHz)

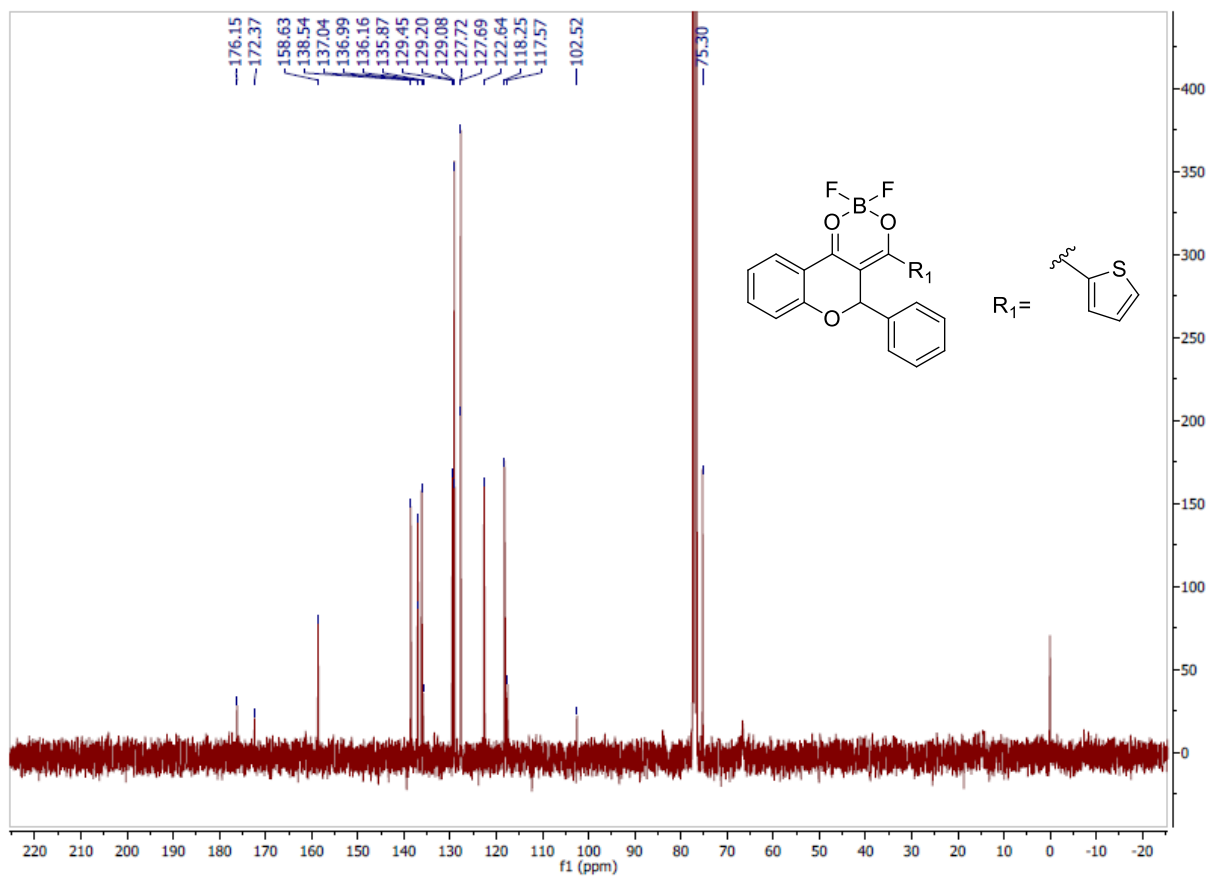

**Figure 15S.** NMR  $^{13}\text{C}$  spectra of compound **4e** ( $\text{CDCl}_3$ , 100 MHz)

The FTIR (ATR),  $^1\text{H}$  NMR (400 MHz) and  $^{13}\text{C}$  NMR (100 MHz) spectra of Compound **4f** in  $\text{CDCl}_3$

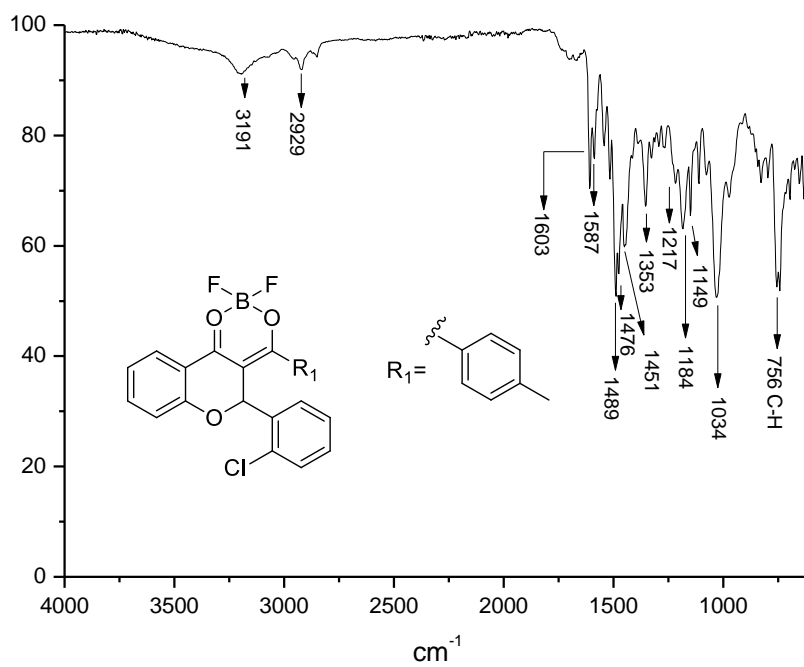

**Figure 16S.** Infrared spectra of compound **4f** (ATR)

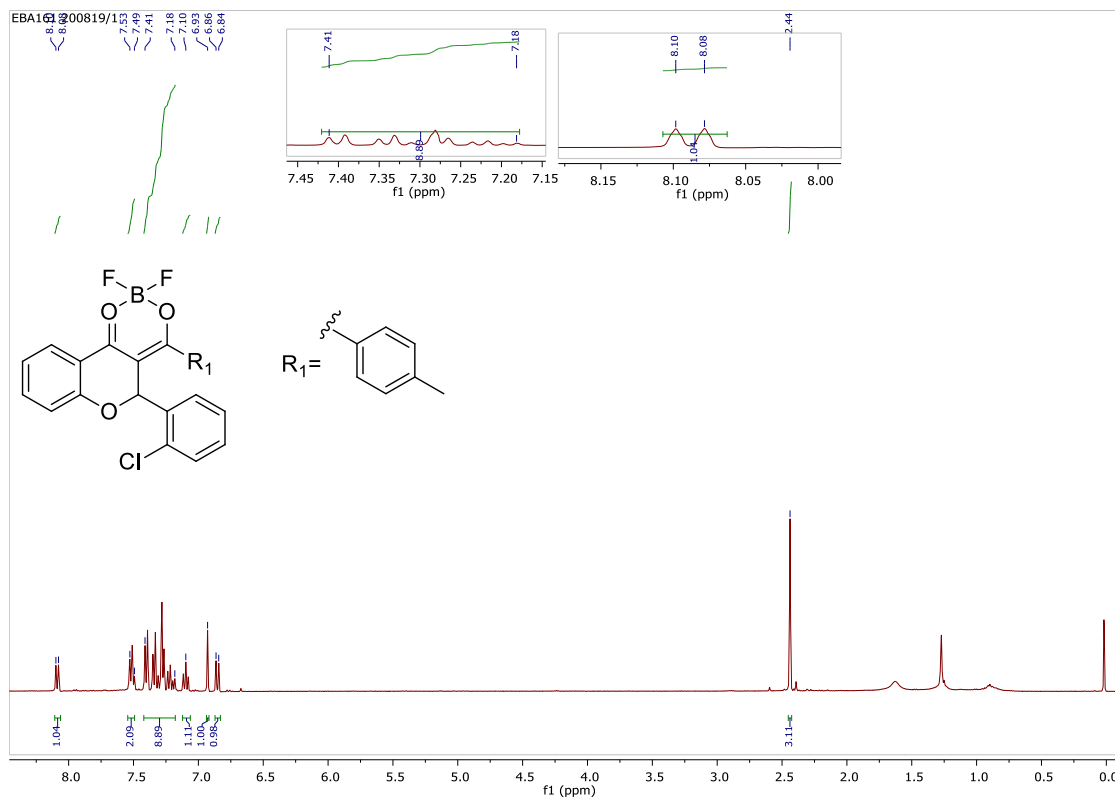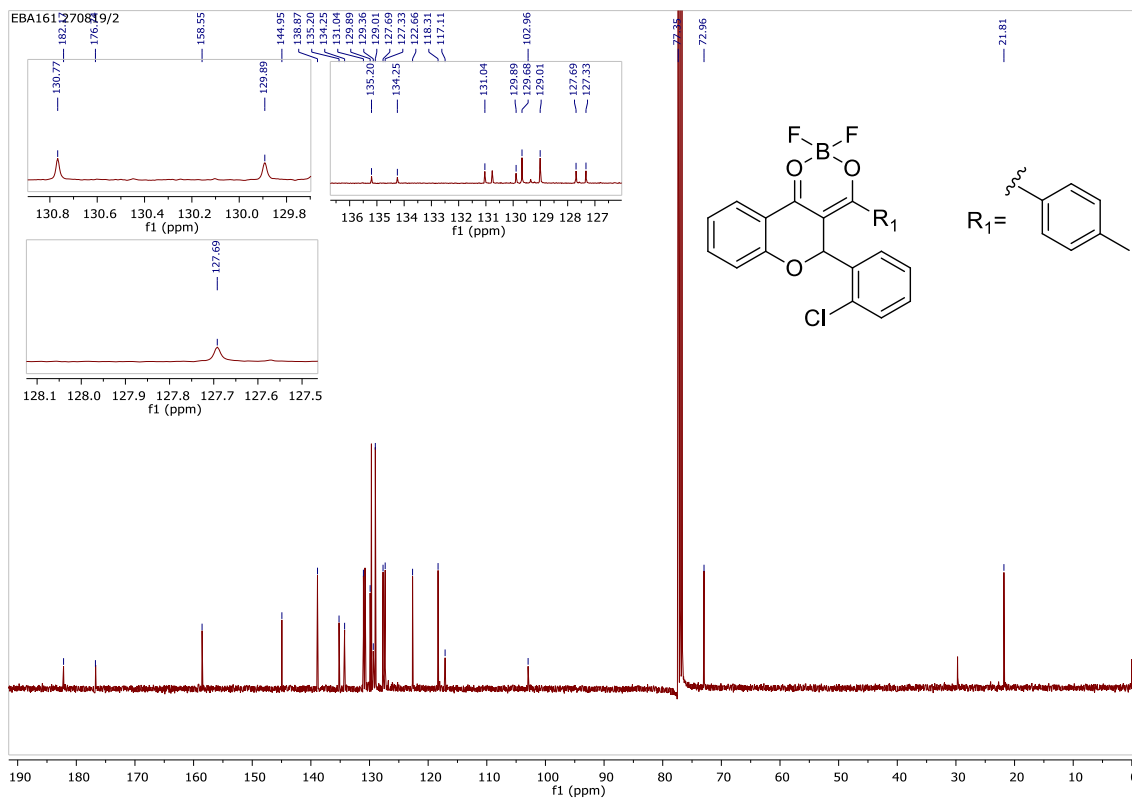

The FTIR (ATR),  $^1\text{H}$  NMR (400 MHz) and  $^{13}\text{C}$  NMR (100 MHz) spectra of Compound **4g** in  $\text{CDCl}_3$

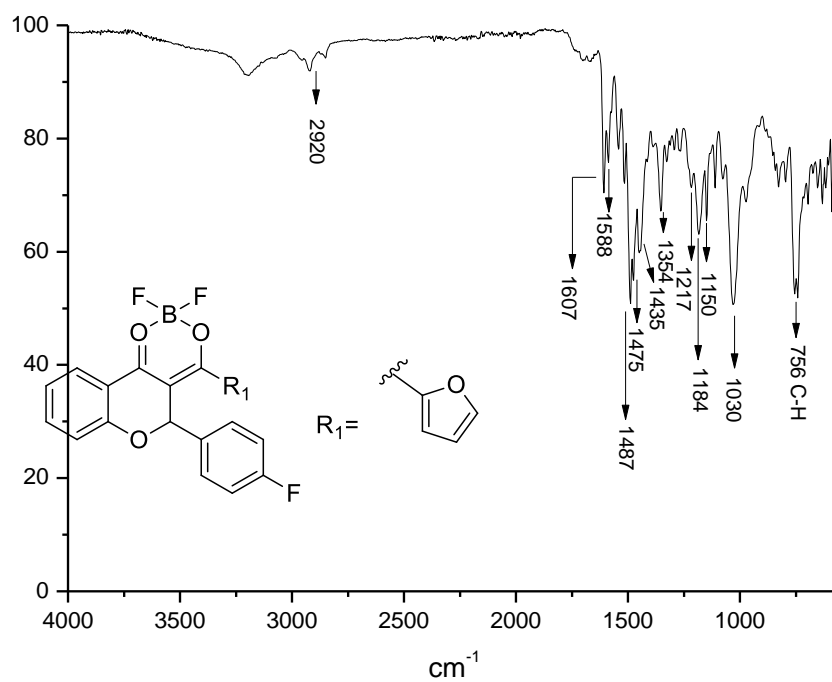

Figure 19S. Infrared spectra of compound **4g** (ATR)

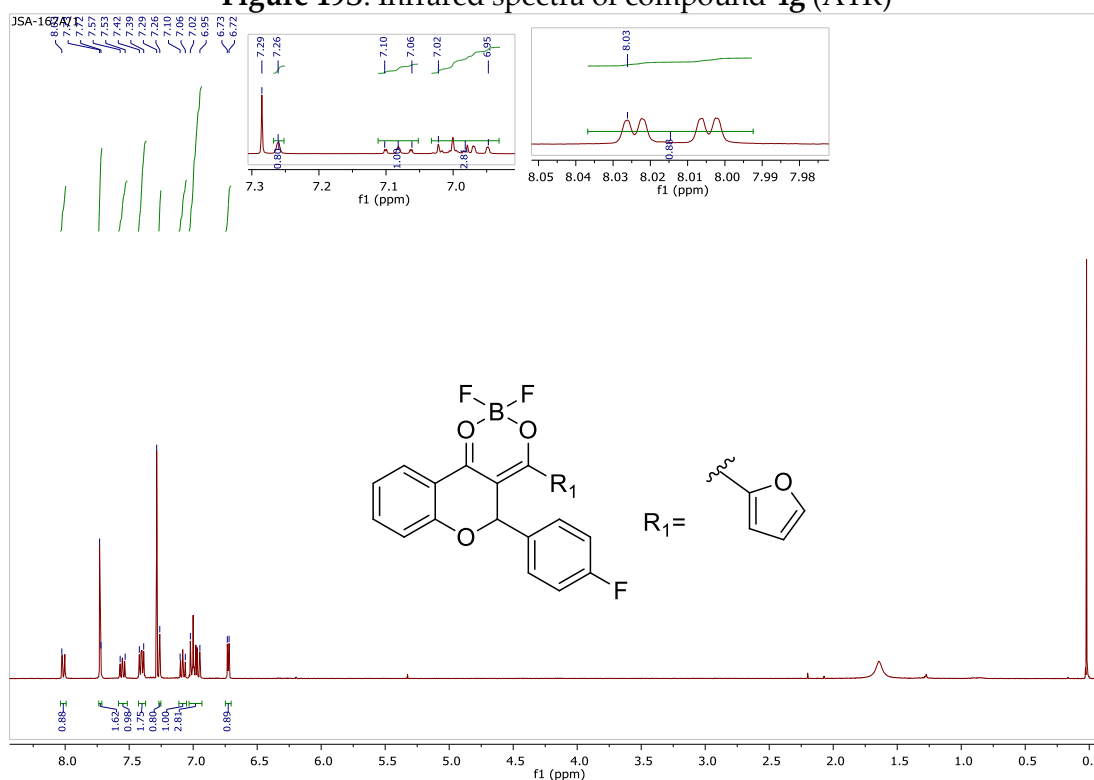

Figure 20S. NMR  $^1\text{H}$  spectra of compound **4g** ( $\text{CDCl}_3$ , 400 MHz)

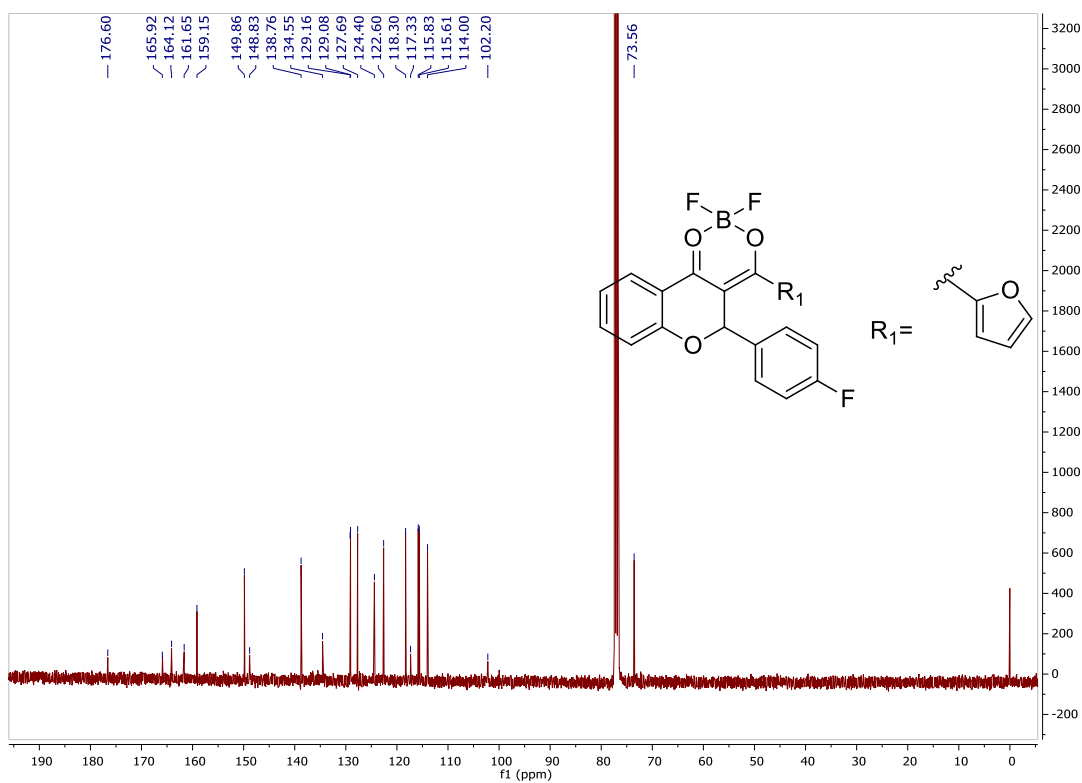

The FTIR (ATR),  $^1\text{H}$  NMR (400 MHz) and  $^{13}\text{C}$  NMR (100 MHz) spectra of Compound **4h** in  $\text{CDCl}_3$

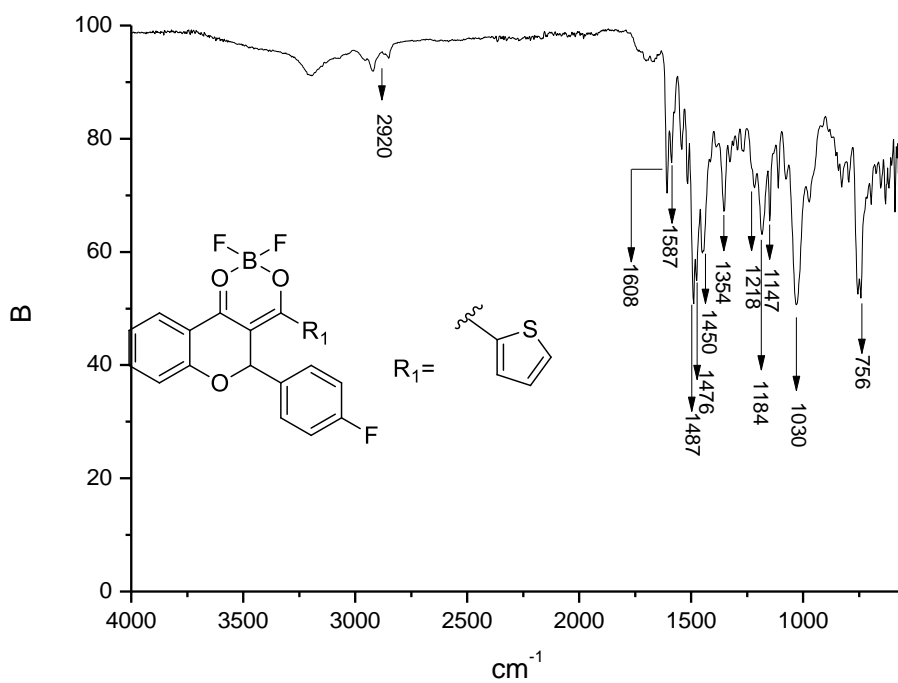

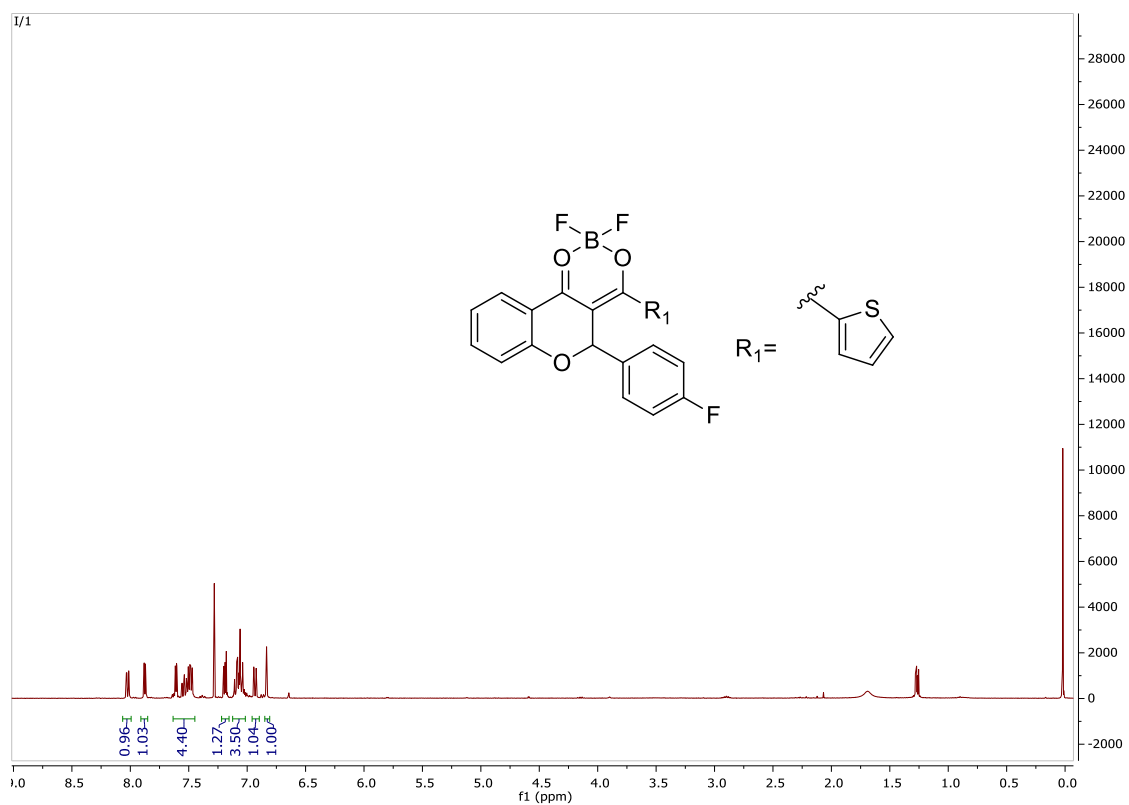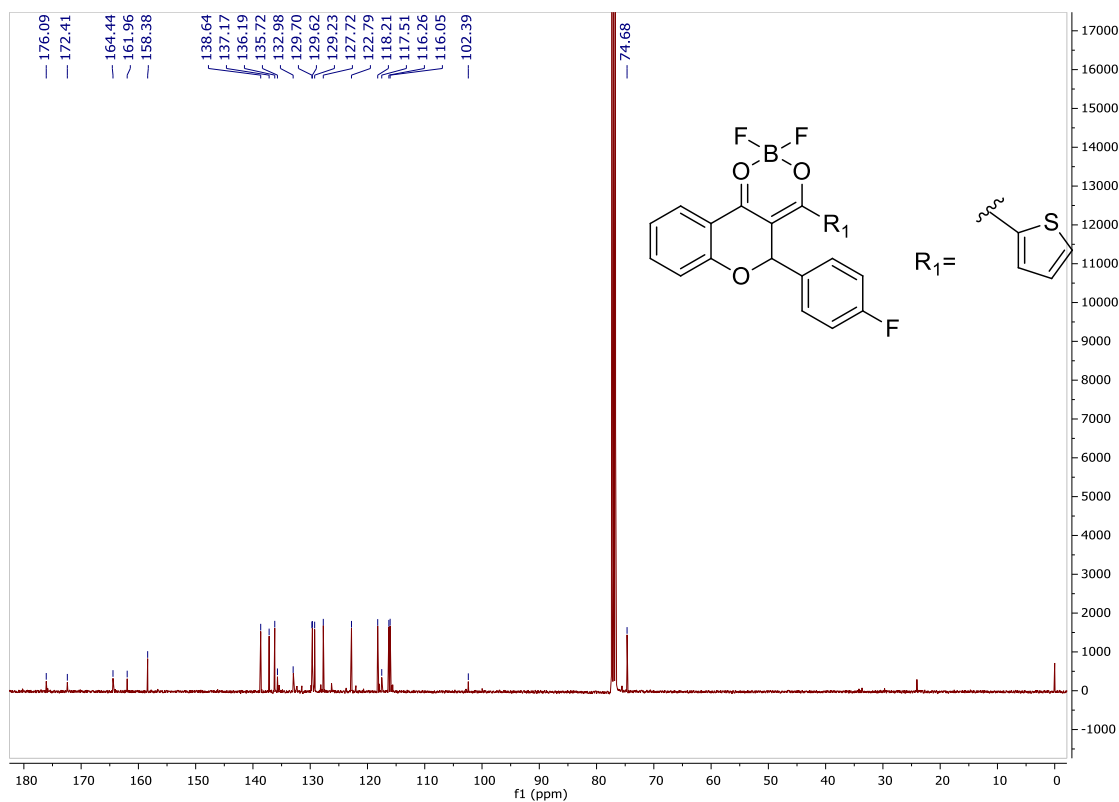

The FTIR (ATR),  $^1\text{H}$  NMR (400 MHz) and  $^{13}\text{C}$  NMR (100 MHz) spectra of Compound **4i** in  $\text{CDCl}_3$

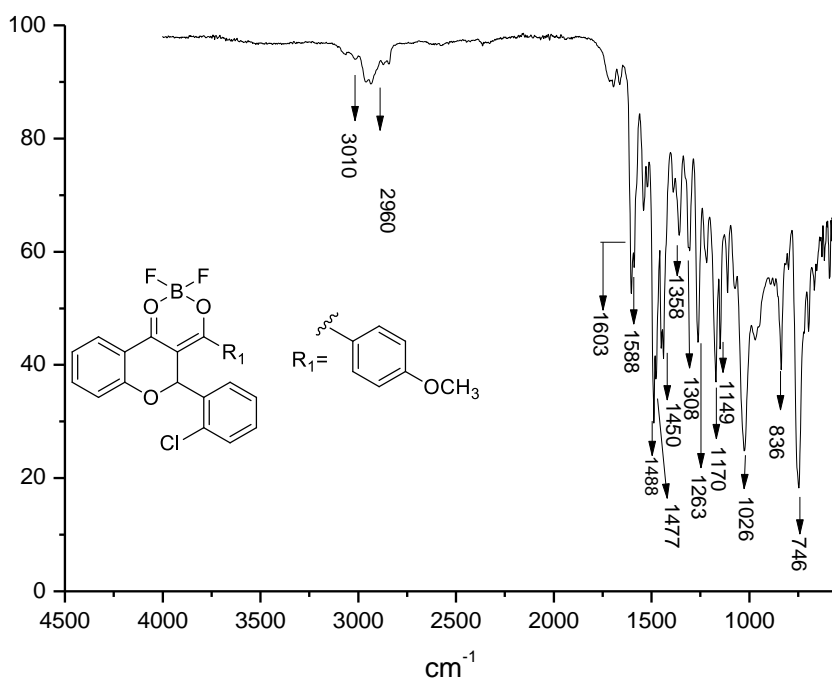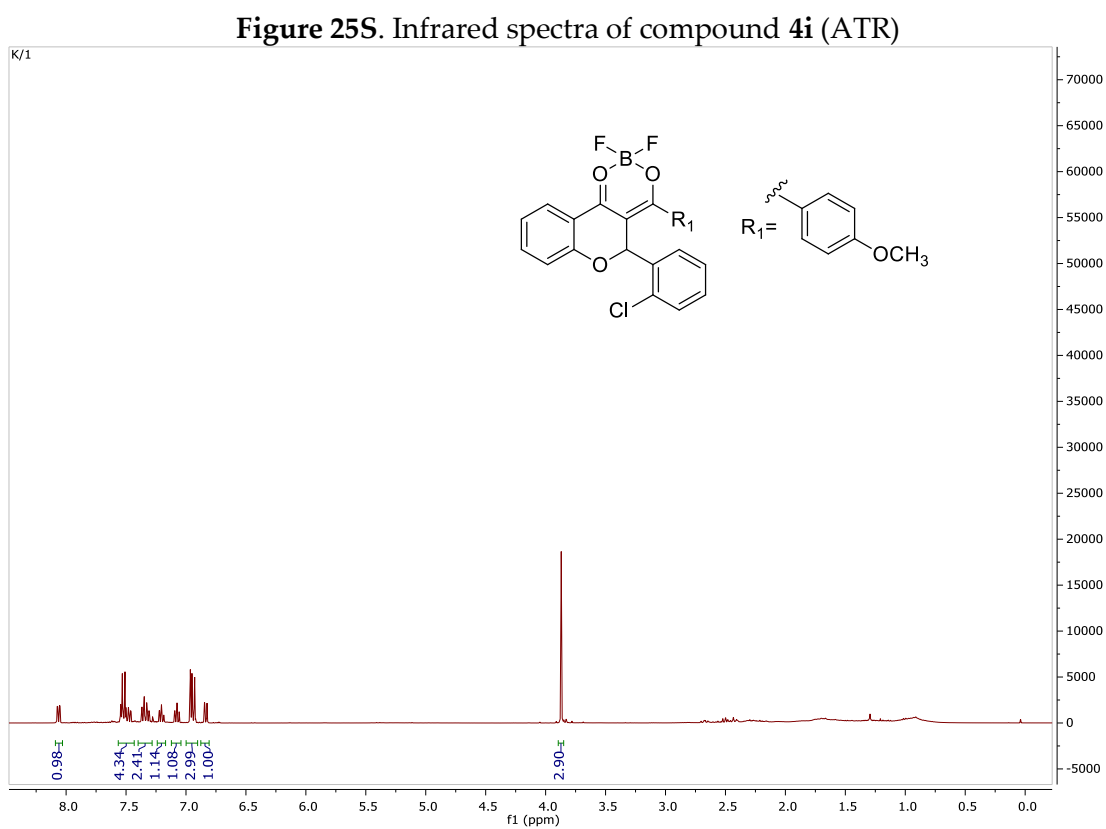

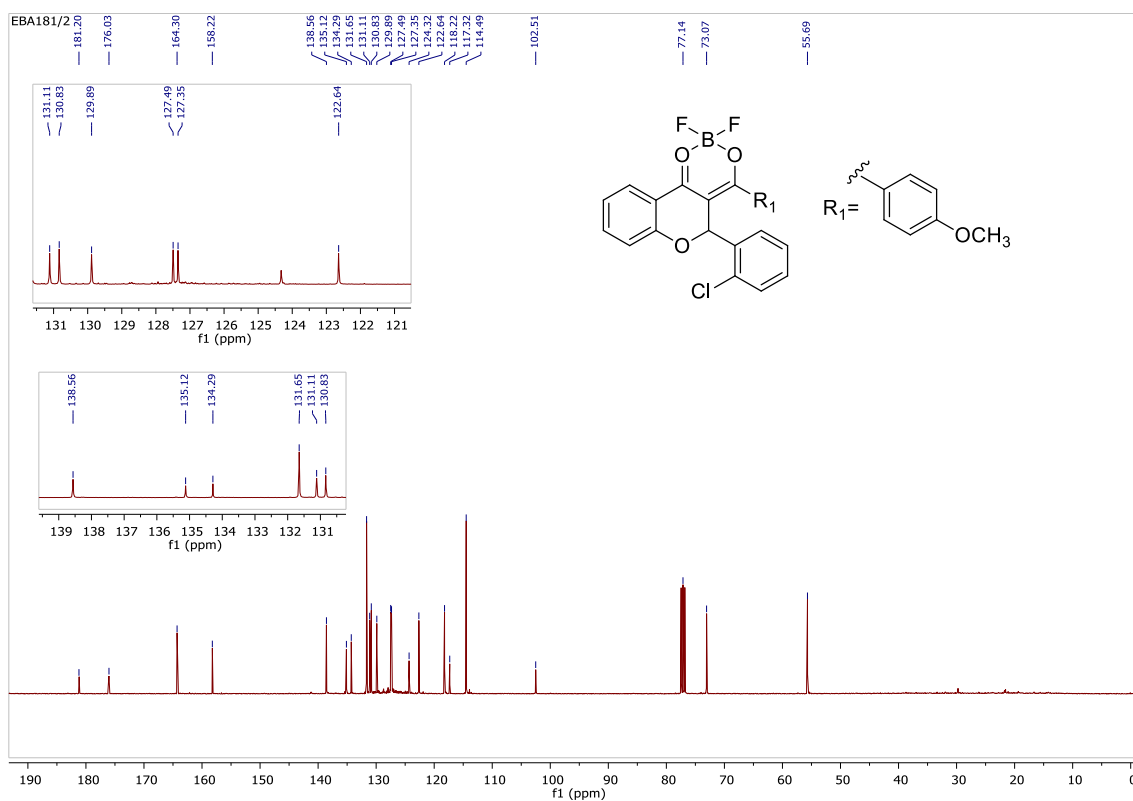

**Figure 27S.** NMR <sup>13</sup>C spectra of compound **4i** (CDCl<sub>3</sub>, 400 MHz)



## Crystallographic Data and Refinement for compound 4e

**Table 1S.** Crystallographic data and refinement structure of compound 4e

|                                   |                                                                                 |
|-----------------------------------|---------------------------------------------------------------------------------|
| Empirical formula                 | C <sub>20</sub> H <sub>13</sub> BF <sub>2</sub> O <sub>3</sub> S                |
| Formula weight                    | 382.17                                                                          |
| Temperature                       | 298(2) K                                                                        |
| Wavelength                        | 1.54184 Å                                                                       |
| Crystal system                    | Monoclinic                                                                      |
| Space group                       | P2 <sub>1</sub> /c                                                              |
| Unit cell dimensions              | a = 10.1117(5) Å<br>b = 18.9112(6) Å; $\beta$ = 117.599(6)°<br>c = 10.1323(5) Å |
| Volume                            | 1717.07(16) Å <sup>3</sup>                                                      |
| Z                                 | 4                                                                               |
| Density (calculated)              | 1.478 Mg/m <sup>3</sup>                                                         |
| Absorption coefficient            | 2.033 mm <sup>-1</sup>                                                          |
| F(000)                            | 784                                                                             |
| Crystal size                      | 0.23 × 0.11 × 0.10 mm <sup>3</sup>                                              |
| Theta range for data collection   | 4.677 to 87.018°.                                                               |
| Index ranges                      | -12 ≤ h ≤ 13, -23 ≤ k ≤ 22, -13 ≤ l ≤ 12                                        |
| Reflections collected             | 22177                                                                           |
| Independent reflections           | 3526 [R(int) = 0.1595]                                                          |
| Completeness to theta = 67.684°   | 99.9 %                                                                          |
| Data / restraints / parameters    | 3526 / 0 / 302                                                                  |
| Goodness-of-fit on F <sup>2</sup> | 1.095                                                                           |
| Final R indices [I > 2σ(I)]       | R1 = 0.0689, wR2 = 0.1871                                                       |
| R indices (all data)              | R1 = 0.0868, wR2 = 0.2190                                                       |
| Extinction coefficient            | 0.0017(4)                                                                       |
| Largest diff. peak and hole       | 0.250 and -0.329 e.Å <sup>-3</sup>                                              |

**Table 2S.** Selected lengths (Å) and connection angles (°) for compound 4e

| Bond        | Length (Å) | Bond             | Angle (°) |
|-------------|------------|------------------|-----------|
| O(2)-C(3)   | 1.307(3)   | C(3)-O(2)-B(1)   | 120.6(3)  |
| O(1)-C(1)   | 1.316(3)   | C(1)-O(1)-B(1)   | 122.2(2)  |
| O(2)-B(1)   | 1.476(5)   | F(1)-B(1)-F(2)   | 112.1(3)  |
| O(1)-B(1)   | 1.458(5)   | F(1)-B(1)-O(1)   | 109.0(3)  |
| F(2)-B(1)   | 1.371(5)   | F(2)-B(1)-O(1)   | 108.3(4)  |
| F(1)-B(1)   | 1.361(4)   | F(1)-B(1)-O(2)   | 108.4(4)  |
| C(3)-C(2)   | 1.380(4)   | F(2)-B(1)-O(2)   | 109.4(3)  |
| C(3)-C(4)   | 1.439(4)   | O(1)-B(1)-O(2)   | 109.7(2)  |
| C(2)-C(1)   | 1.402(4)   | O(2)-C(3)-C(2)   | 122.1(3)  |
| C(2)-C(14)  | 1.513(3)   | O(2)-C(3)-C(4)   | 115.3(3)  |
| C(14)-C(15) | 1.518(3)   | C(2)-C(3)-C(4)   | 122.6(2)  |
| C(10)-S(1)  | 1.598(10)  | C(3)-C(2)-C(1)   | 118.4(2)  |
| C(10)-C(11) | 1.635(12)  | C(3)-C(2)-C(14)  | 119.4(2)  |
| C(12)-C(11) | 1.572(16)  | C(10)-S(1)-C(13) | 95.5(8)   |
| C(4)-C(9)   | 1.317(8)   | C(4)-C(9)-O(3)   | 129.0(6)  |

C(4)-C(5)    |    1.418(4)    |    C(4)-C(9)-C(8)    |    115.4(7)

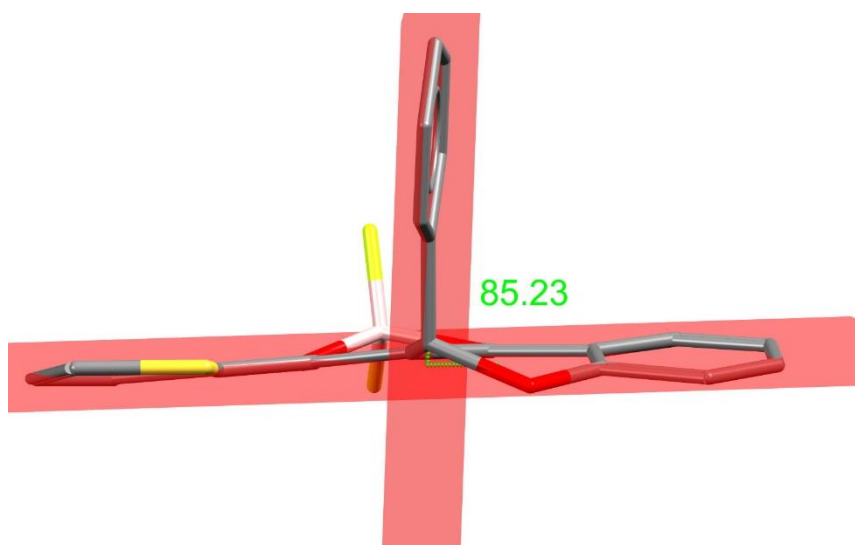

**Figure 28S.** X-ray structure showing molecule **4e** conformation.

### Absorption spectra of the compounds with concentration vs absorption plots

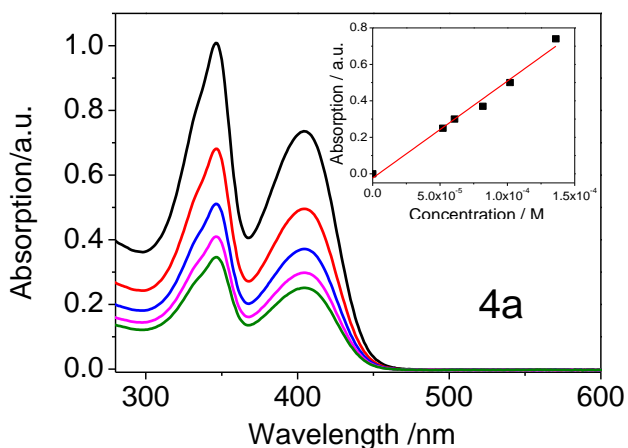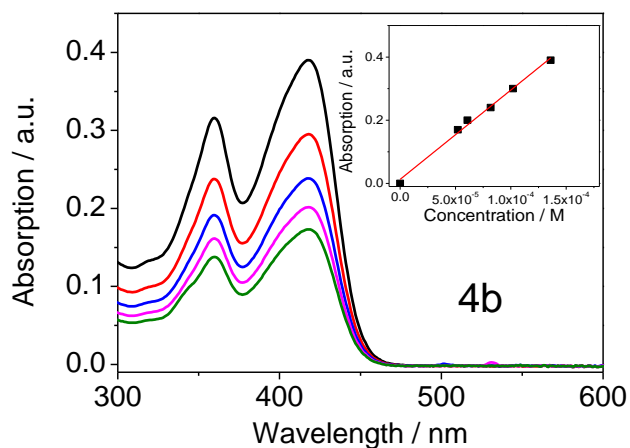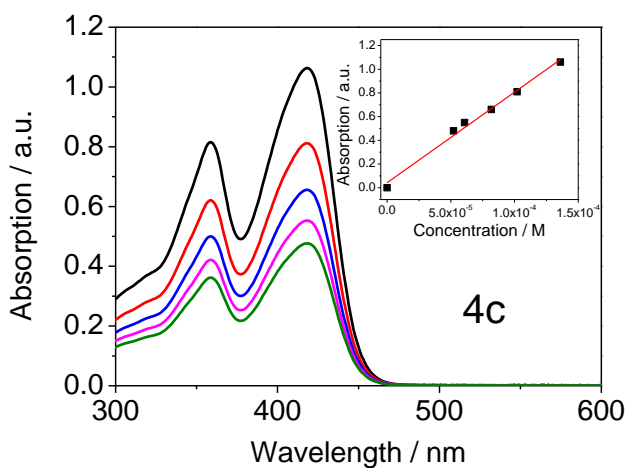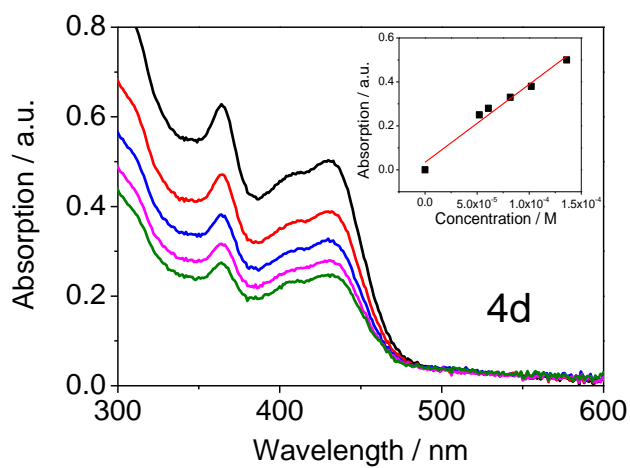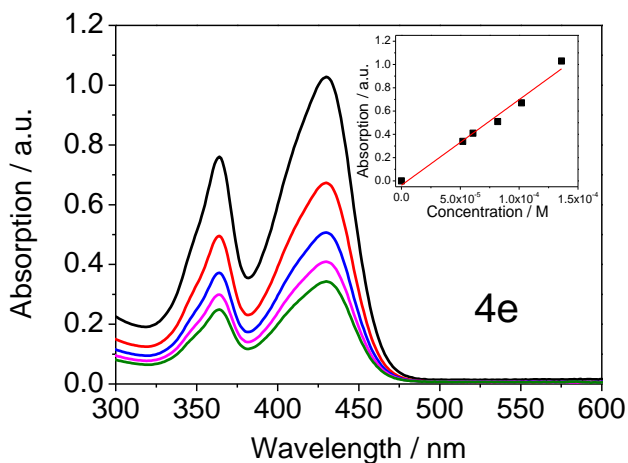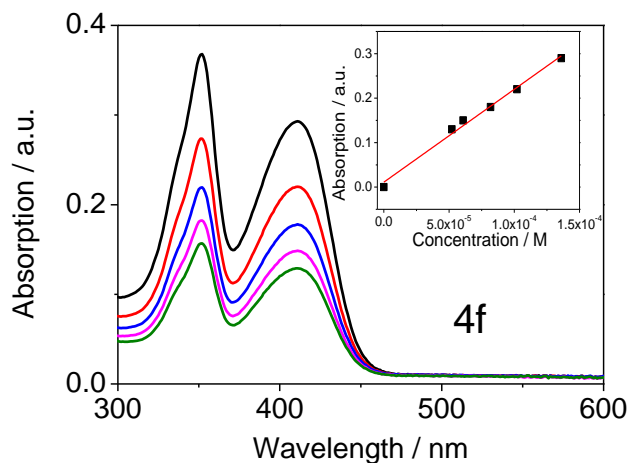

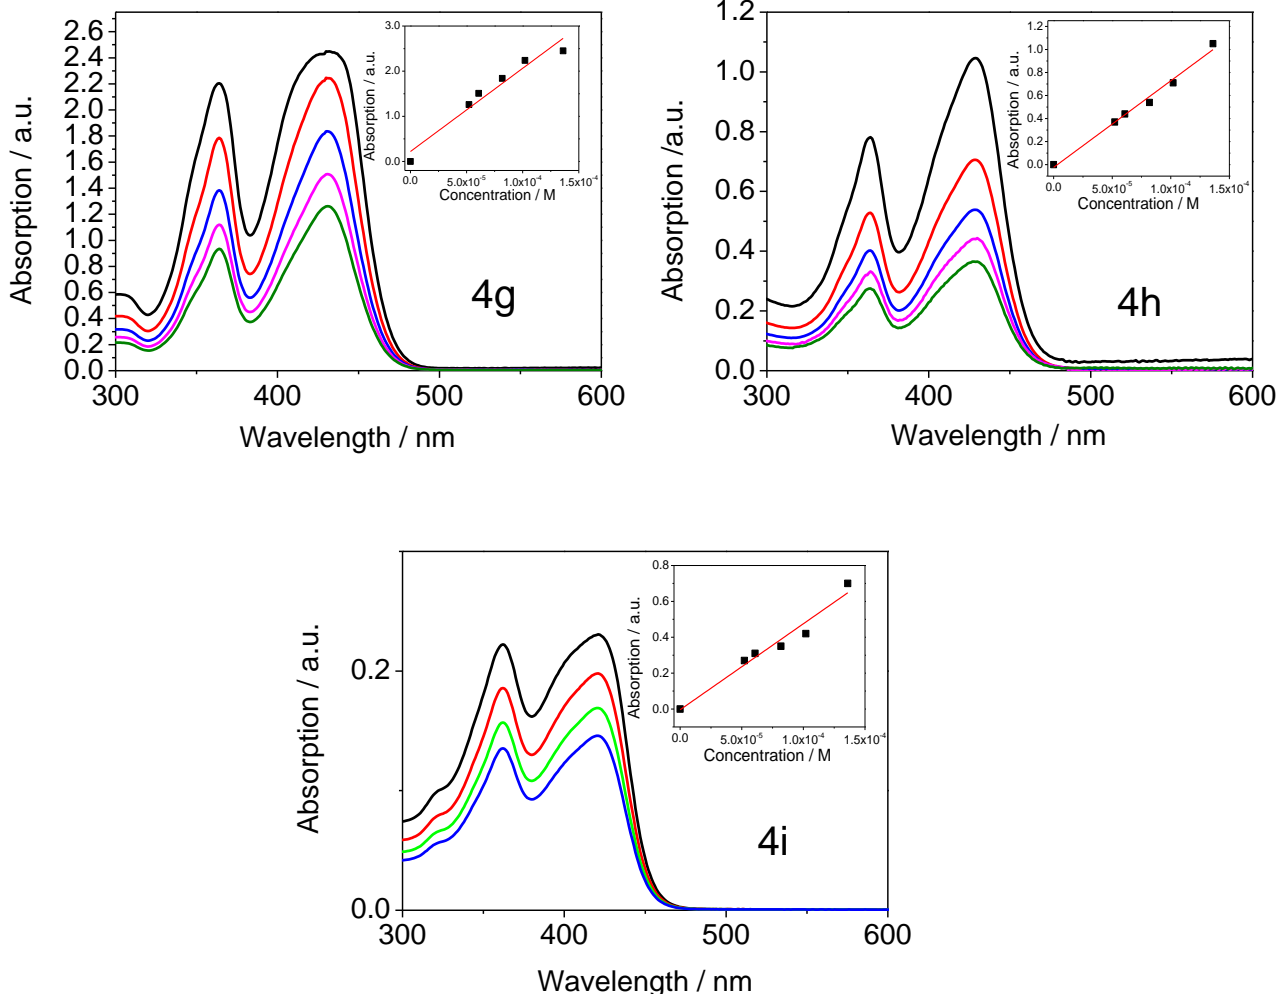

**Figure 29S:** Absorption spectra of the compounds in chloroform solution with concentration ranging from  $5.0 \times 10^{-5}$  to  $1.5 \times 10^{-4}$  M. Inset shows the maximum absorption intensities with concentration of the compound whereas the molar absorption coefficients ( $\epsilon$ ) of the compounds were evaluated from slopes of the curves using the Beer-Lambert law.

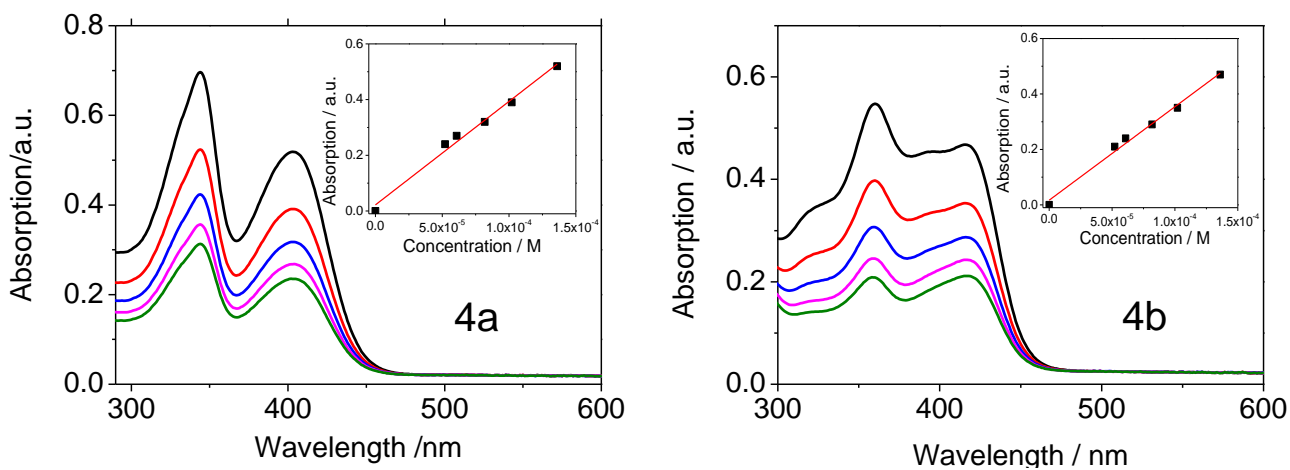

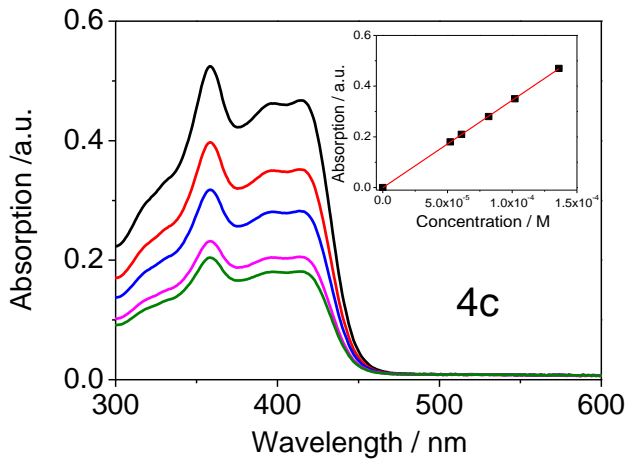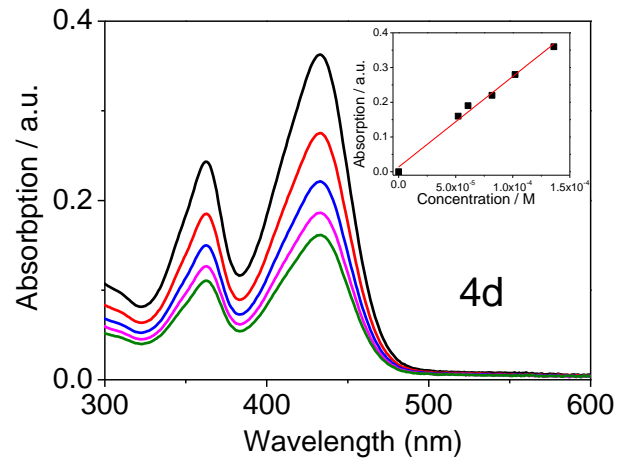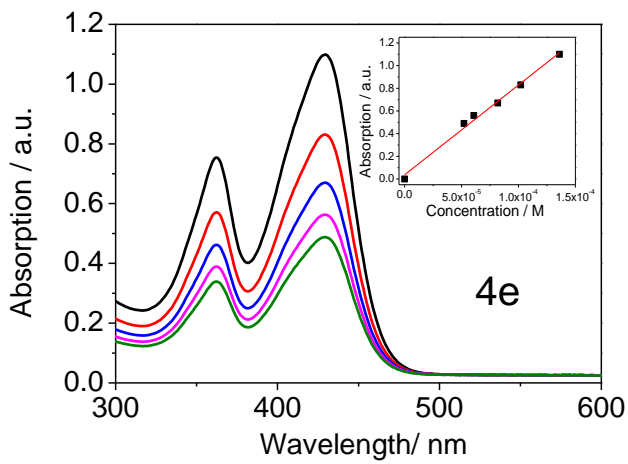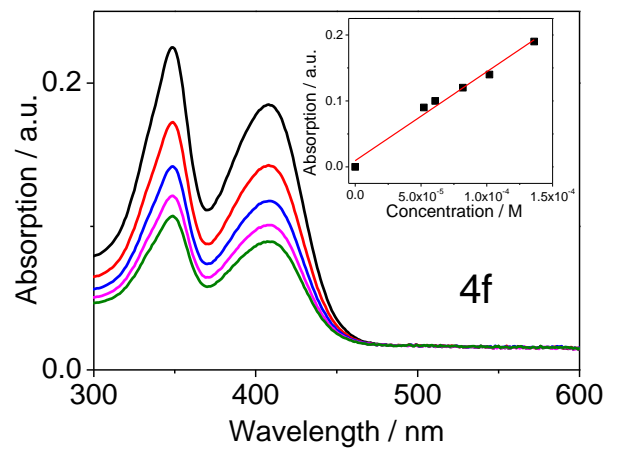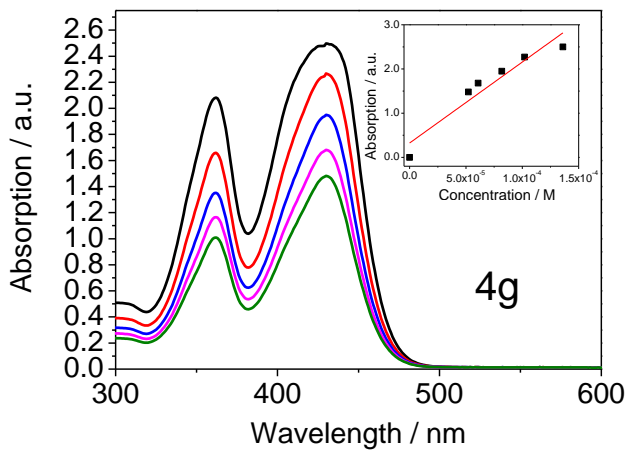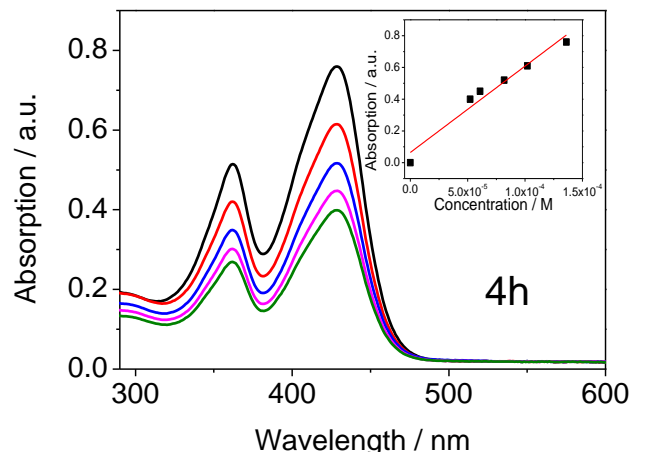

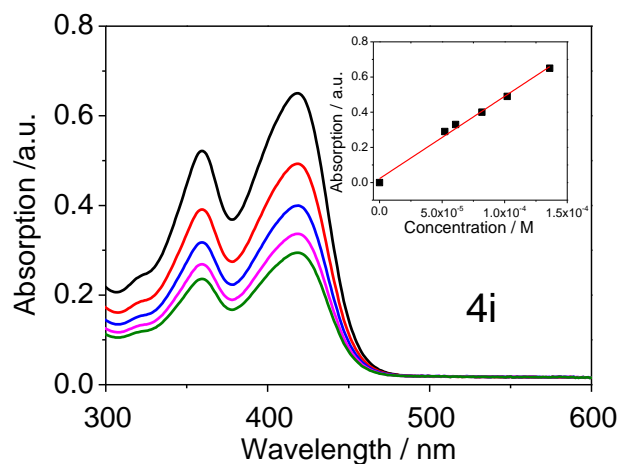

**Figure 30S:** Absorption spectra of the compounds in acetonitrile solution with concentration ranging from  $5 \times 10^{-5}$  to  $1 \times 10^{-4}$  M. Inset shows the maximum absorption intensities with concentration of the compound whereas the molar absorption coefficients ( $\epsilon$ ) of the compounds were evaluated from slopes of the curves using the Beer-Lambert law.

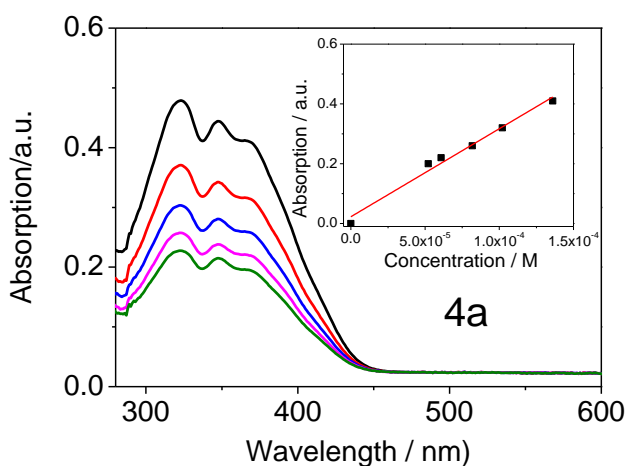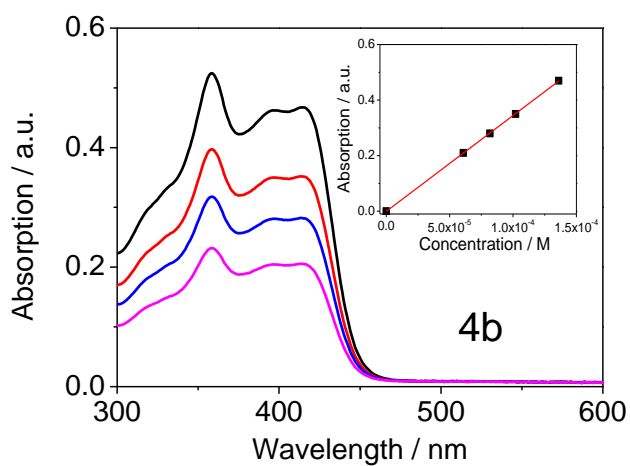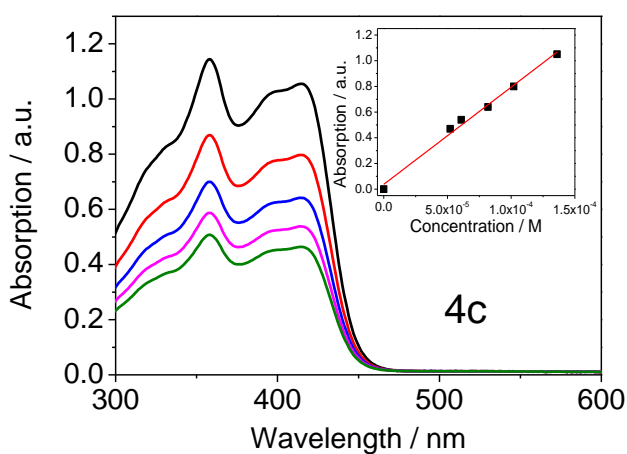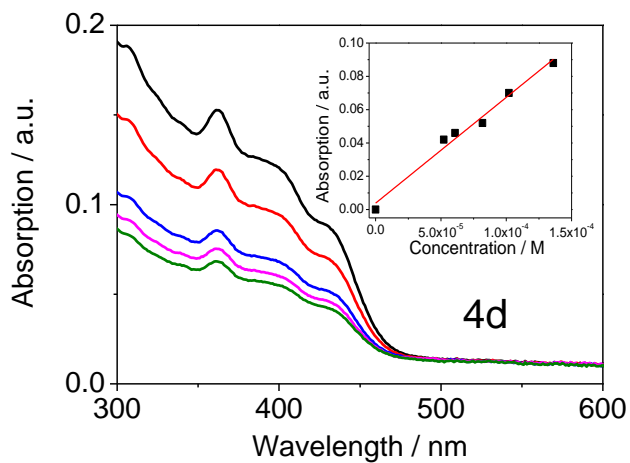

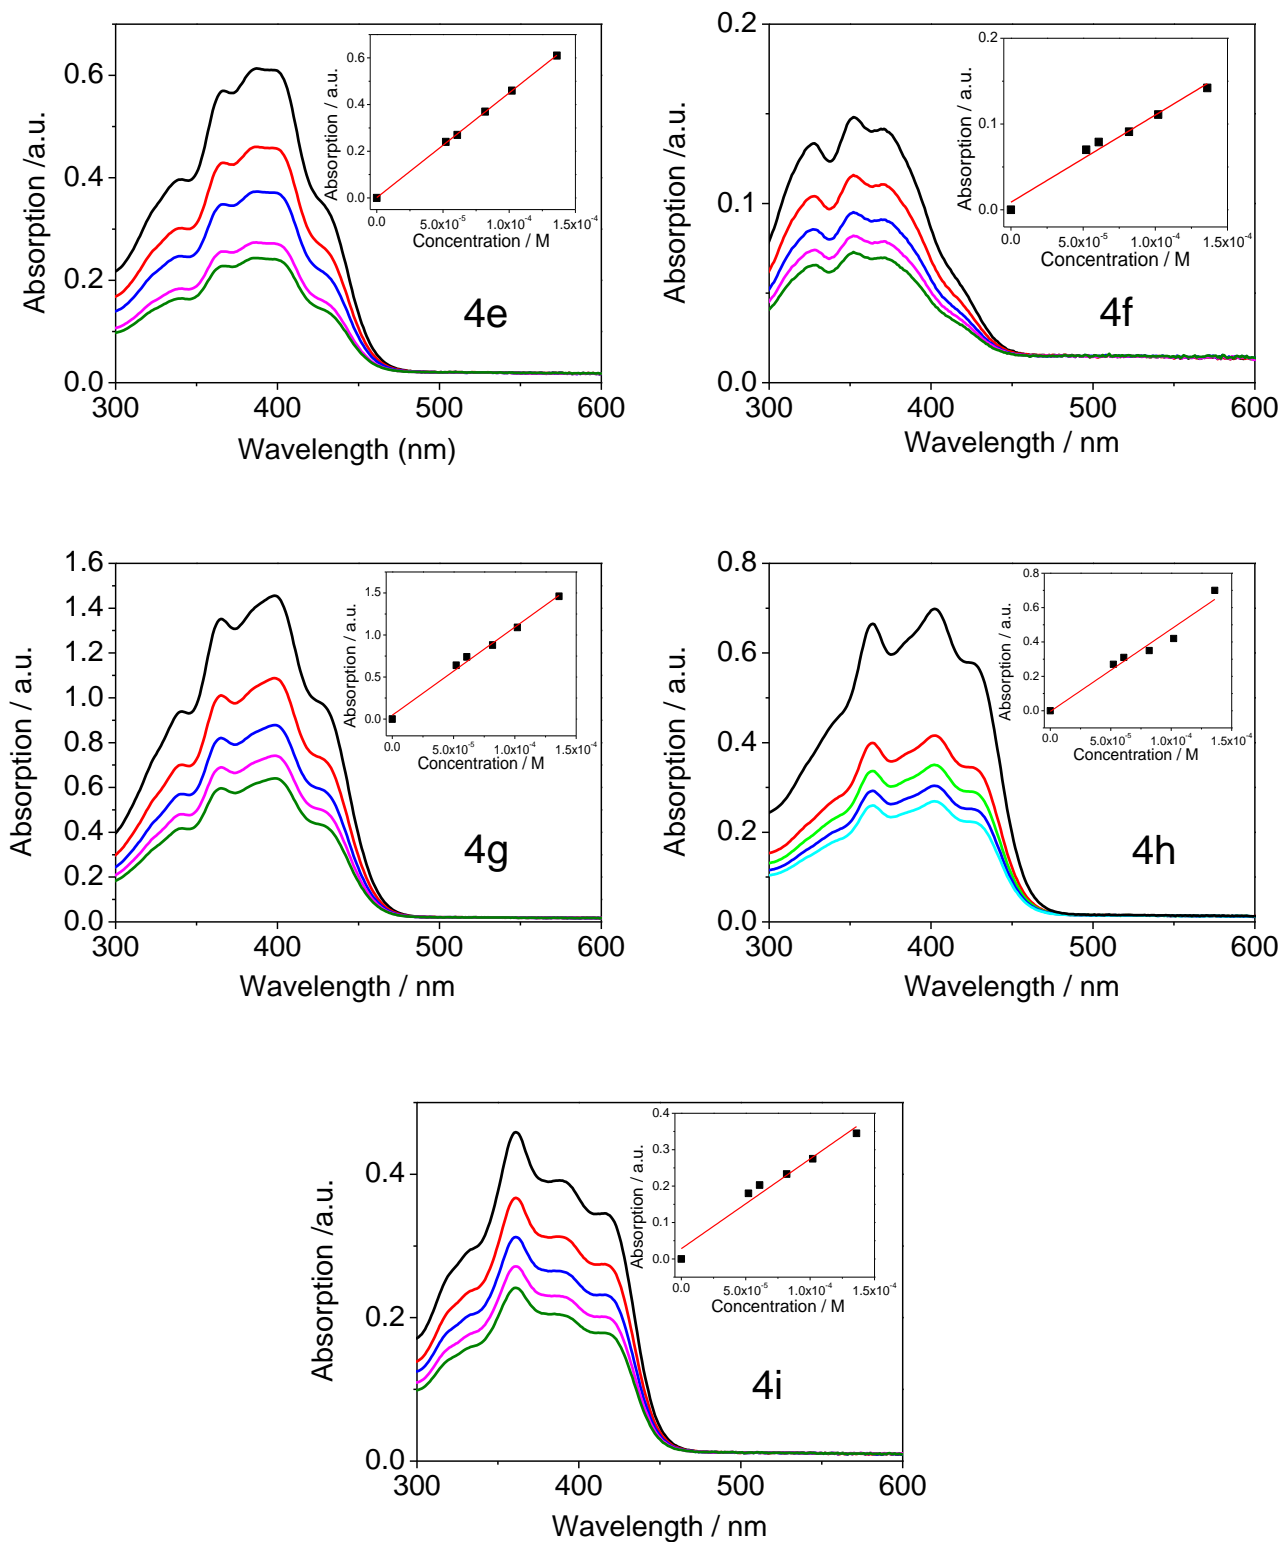

**Figure 31S:** Absorption spectra of the compounds in tetrahydrofuran solution with concentration ranging from  $5 \times 10^{-5}$  to  $1 \times 10^{-4}$  M. Inset shows the maximum absorption intensities with concentration of the compound whereas the molar absorption coefficients ( $\epsilon$ ) of the compounds were evaluated from slopes of the curves using the Beer-Lambert law.

## Fluorescence Decay Curves

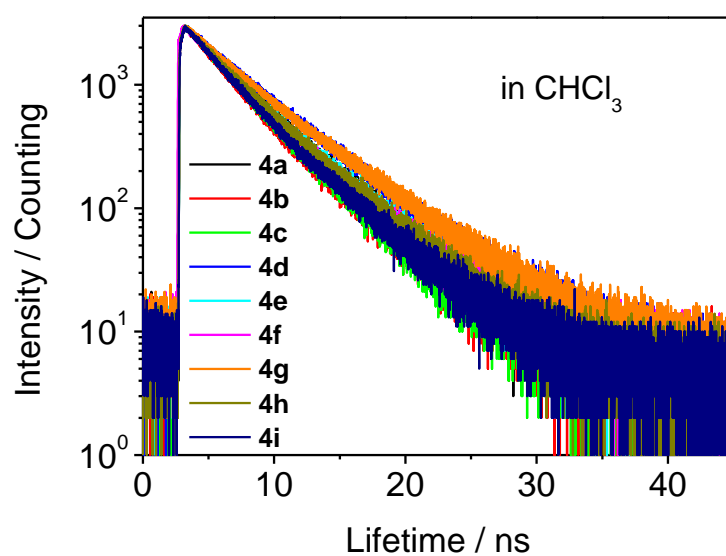

**Figure 32S:** The fluorescence decay curves of the compounds in chloroform solution

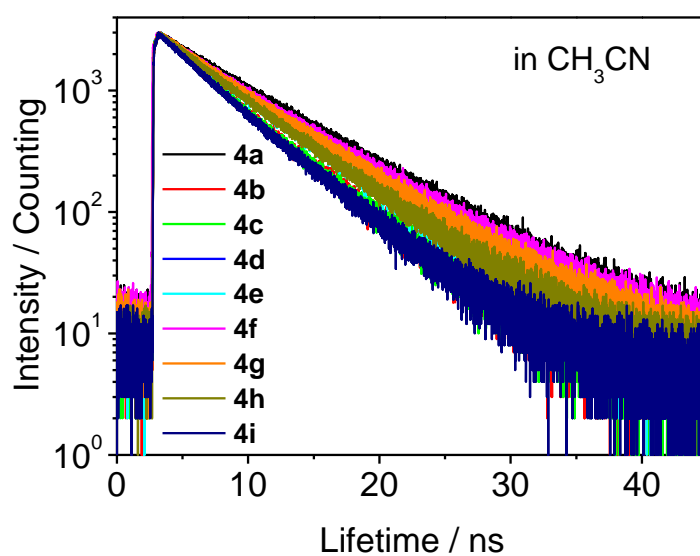

**Figure 33S:** The fluorescence decay curves of the compounds in acetonitrile solution



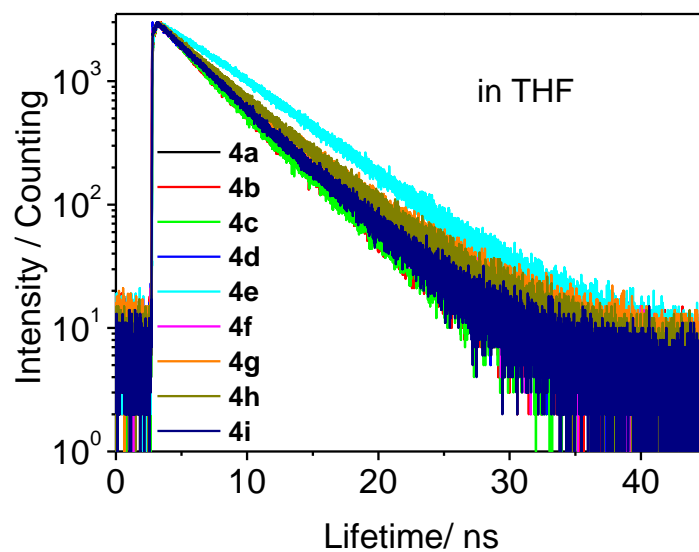

**Figure 34S:** The fluorescence decay curves of the compounds in tetrahydrofuran solution

**Electrochemical properties of compounds: Cyclic voltammograms of the compounds 4a-i**

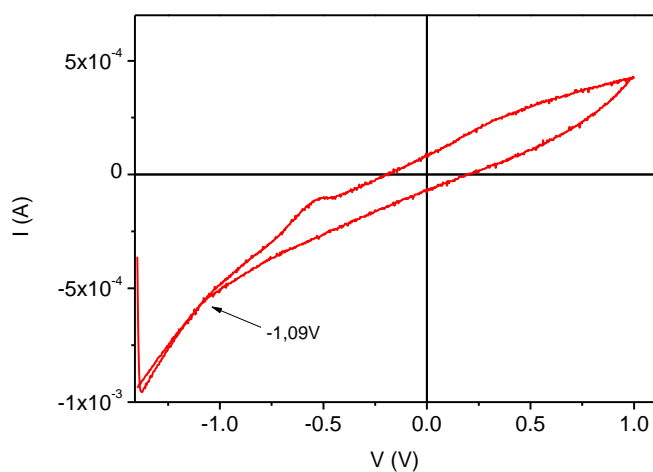

**Figure 35S.** Cyclic voltammograms of compound 4a

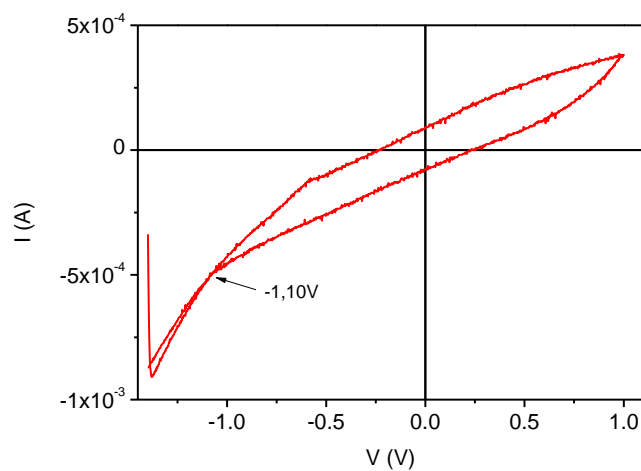

**Figure 36S.** Cyclic voltammograms of compound 4b

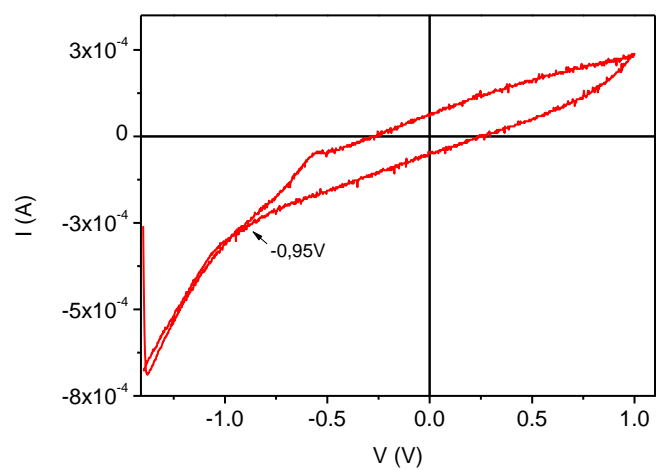

**Figure 37S.** Cyclic voltammograms of compound **4c**

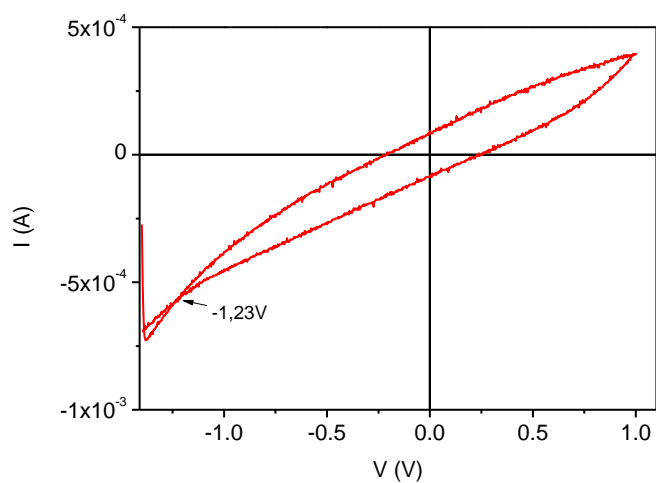

**Figure 38S.** Cyclic voltammograms of compound **4d**

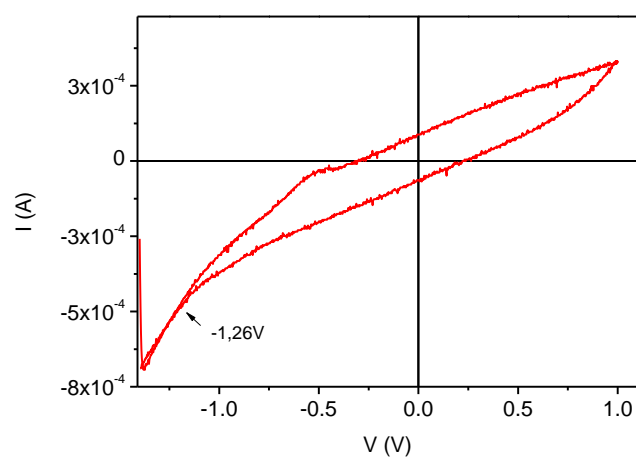

**Figure 39S.** Cyclic voltammograms of compound **4e**

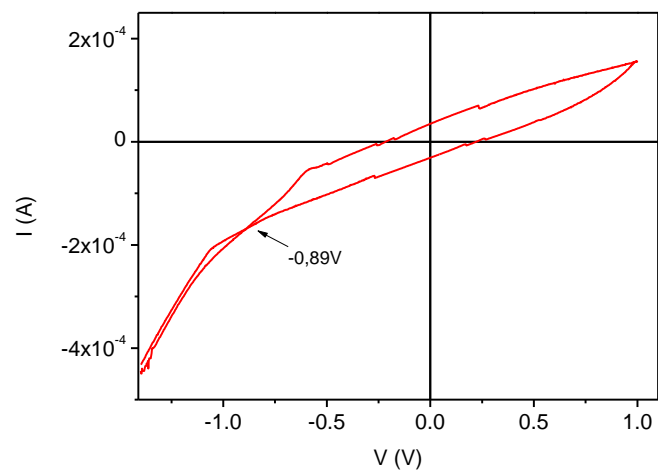

**Figure 40S.** Cyclic voltammograms of compound **4f**

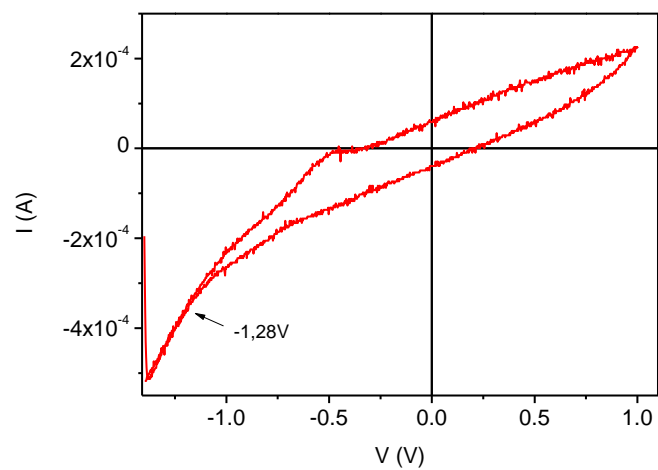

**Figure 41S.** Cyclic voltammograms of compound **4g**

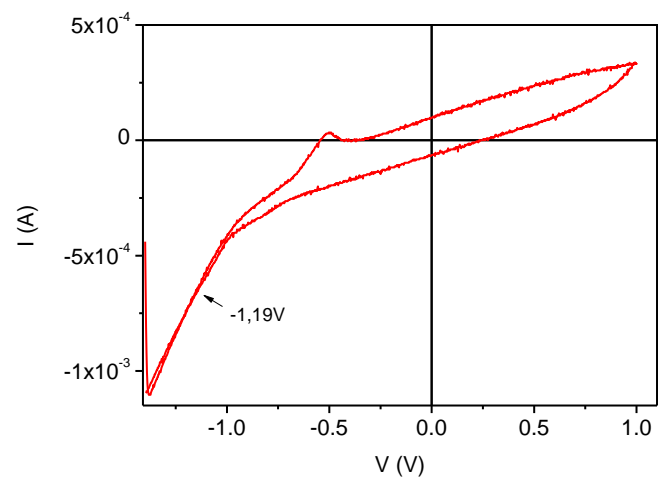

**Figure 42S.** Cyclic voltammograms of compound **4h**

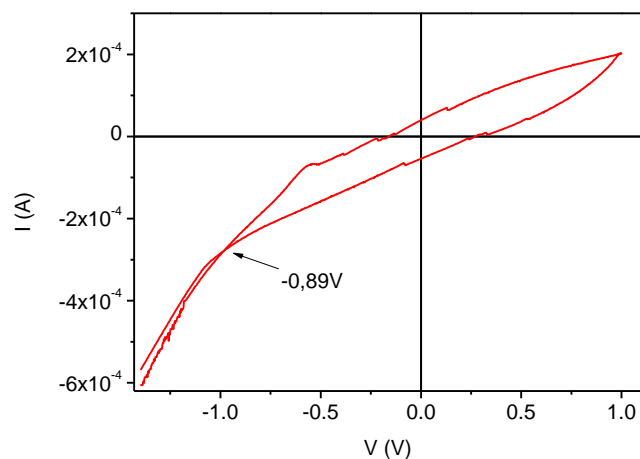

Figure 43S. Cyclic voltammograms of compound 4i

Computational Studies for compounds 4a and 4e

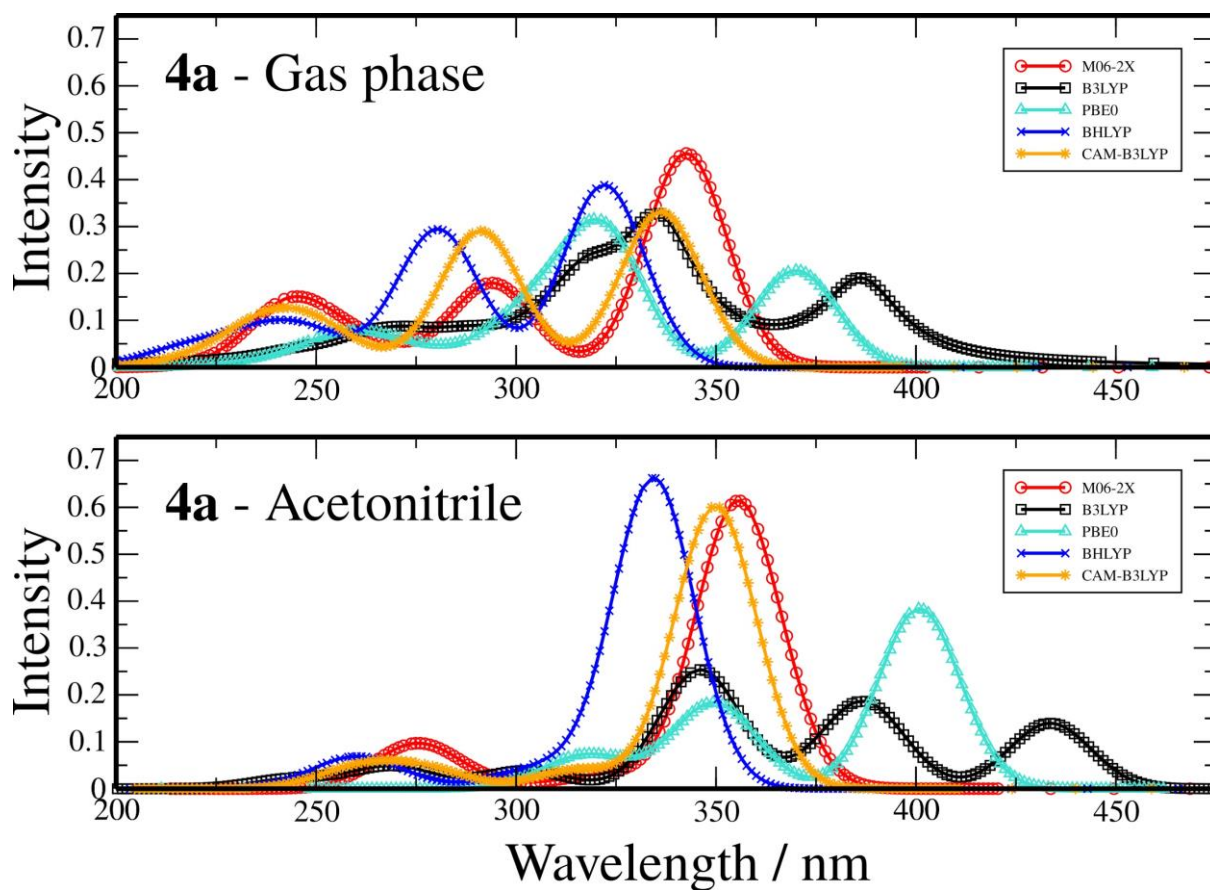

Figure 44S. Theoretical absorption spectra for 10 excited states for molecule 4a compared for all exchange-correlation functionals studied for gas phase (top) and acetonitrile (down).

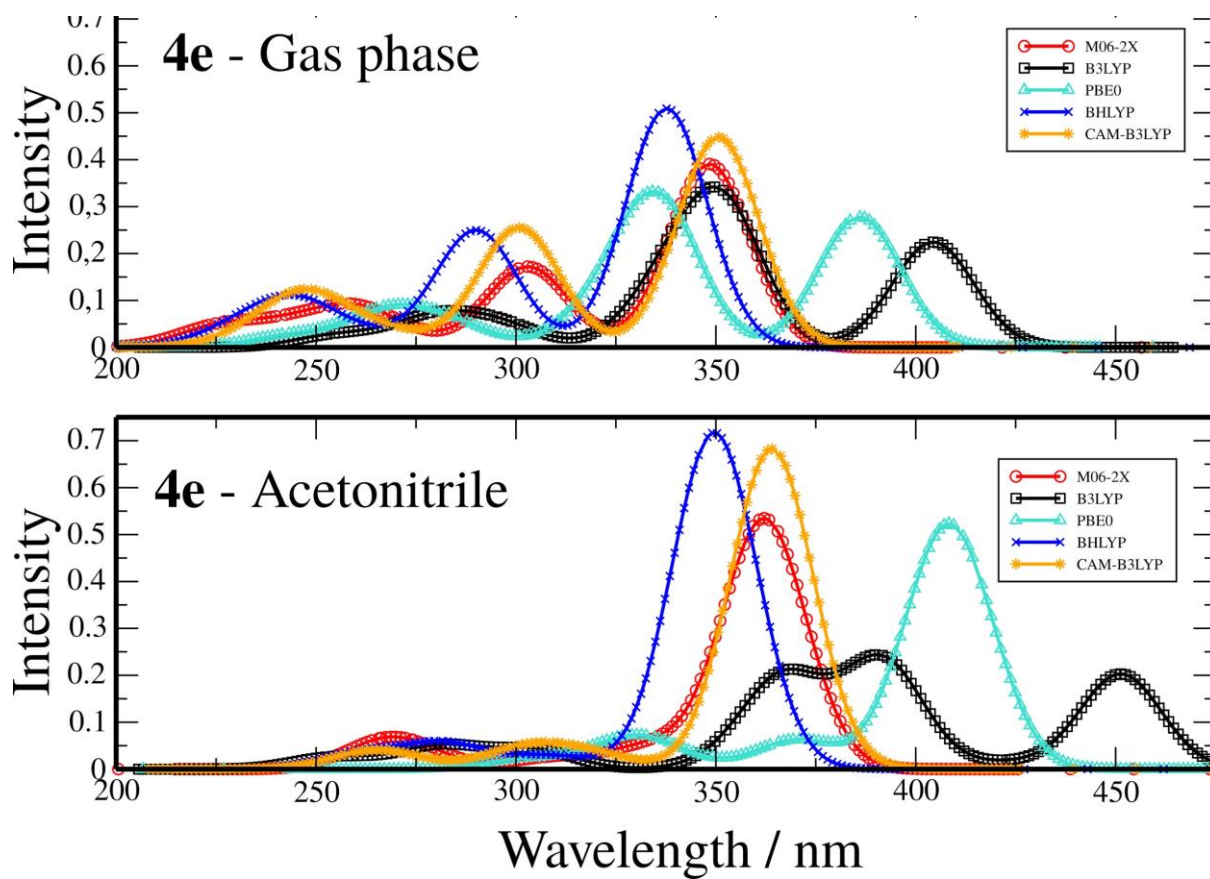

**Figure 45S.** Theoretical absorption spectra for 10 excited states for molecule 4e compared for all exchange-correlation functionals studied for gas phase (top) and acetonitrile (down).

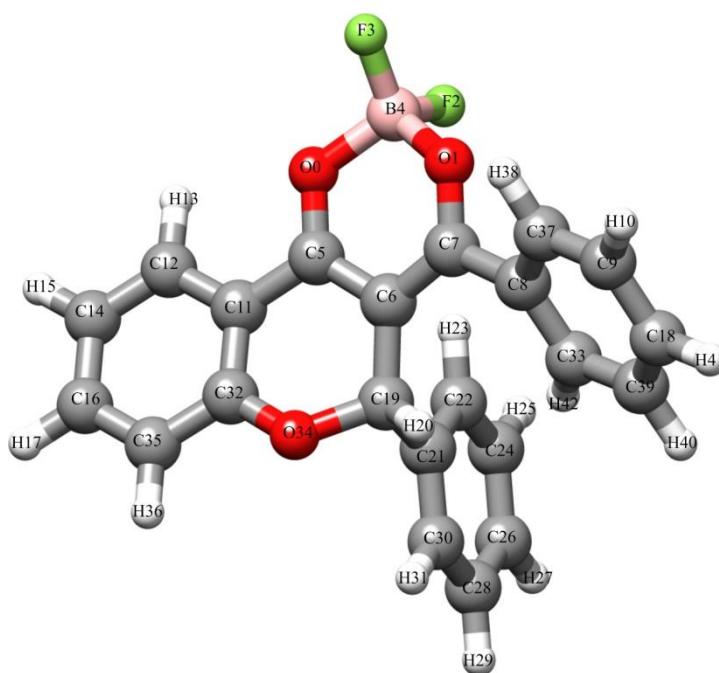

**Figure 46S.** Optimized geometry for molecule **4a**. Labels identify the atoms for the Table 3S.

**Table 3S.** Optimized Bond distances (Å) and angles (degrees) selecting to molecule **4a**. Calculations were performed with DFT and B3LYP functional. Figure 44S shows the atom labels definition.

| Bond  | Distance (Å) | Bond     | Angle (°) | Bond        | Angle (°) |
|-------|--------------|----------|-----------|-------------|-----------|
| B4-F2 | 1.3764       | B4-O0-C5 | 121.15    | C21-C22-H23 | 120.23    |
| B4-O1 | 1.5083       | B4-O1-C7 | 122.84    | H23-C22-C24 | 119.29    |
| B4-F3 | 1.3606       | O1-B4-F2 | 108.48    | C21-C22-C24 | 120.47    |
| B4-O0 | 1.5116       | O0-B4-F2 | 108.33    | H25-C24-C26 | 120.22    |
| C5-O0 | 1.2883       | O1-B4-F3 | 109.00    | C22-C24-C26 | 120.24    |
| C6-C5 | 1.4085       | F2-B4-F3 | 114.49    | C22-C24-H25 | 119.54    |
| C7-O1 | 1.2953       | O0-B4-O1 | 107.32    | H27-C26-C28 | 120.12    |
| C7-C6 | 1.3995       | O0-B4-F3 | 108.99    | C24-C26-C28 | 119.68    |

|         |        |                 |        |             |        |
|---------|--------|-----------------|--------|-------------|--------|
| C8-C7   | 1.4801 | O0-C5-C11       | 117.55 | C24-C26-H27 | 120.20 |
| H10-C9  | 1.0829 | C6-C5-C11       | 119.36 | H29-C28-C30 | 119.87 |
| C11-C5  | 1.4494 | O0-C5-C6        | 122.93 | C26-C28-C30 | 120.03 |
| C12-C11 | 1.4035 | C5-C6-C19       | 117.28 | C26-C28-H29 | 120.09 |
| H13-C12 | 1.0814 | C5-C6-C7        | 117.36 | C28-C30-H31 | 119.83 |
| C14-C12 | 1.3805 | C7-C6-C19       | 125.06 | C21-C30-H31 | 119.45 |
| H15-C14 | 1.0819 | O1-C7-C8        | 113.76 | C21-C30-C28 | 120.72 |
| C16-C14 | 1.3991 | C6-C7-C8        | 125.47 | O34-C32-C35 | 118.13 |
| H17-C16 | 1.0833 | O1-C7-C6        | 120.66 | C11-C32-C35 | 120.13 |
| C18-C9  | 1.3923 | C33-C8-C37      | 119.09 | C11-C32-O34 | 121.65 |
| C19-C6  | 1.5088 | C7-C8-C37       | 117.97 | C39-C33-H42 | 119.15 |
| H20-C19 | 1.0881 | C7-C8-C33       | 122.89 | C8-C33-H42  | 120.54 |
| C21-C19 | 1.5260 | H10-C9-C18      | 120.13 | C8-C33-C39  | 120.24 |
| C22-C21 | 1.3928 | C18-C9-C37      | 120.18 | C19-O34-C32 | 117.31 |
| H23-C22 | 1.0823 | H10-C9-C37      | 119.69 | C32-C35-H36 | 118.97 |
| C24-C22 | 1.3931 | C12-C11-<br>C32 | 119.44 | C16-C35-H36 | 121.61 |
| H25-C24 | 1.0826 | C5-C11-C32      | 118.08 | C16-C35-C32 | 119.43 |
| C26-C24 | 1.3880 | C5-C11-C12      | 122.26 | C9-C37-H38  | 120.42 |
| H27-C26 | 1.0830 | C11-C12-<br>C14 | 120.35 | C8-C37-H38  | 119.21 |
| C28-C26 | 1.3930 | C11-C12-<br>H13 | 118.49 | C8-C37-C9   | 120.38 |
| H29-C28 | 1.0830 | H13-C12-<br>C14 | 121.16 | C33-C39-H40 | 119.54 |
| C30-C28 | 1.3869 | H15-C14-<br>C16 | 120.19 | C18-C39-H40 | 120.20 |

|         |        |                 |        |             |        |
|---------|--------|-----------------|--------|-------------|--------|
| C30-C21 | 1.3986 | C12-C14-<br>C16 | 119.56 | C18-C39-C33 | 120.26 |
| H31-C30 | 1.0837 | C12-C14-<br>H15 | 120.25 |             |        |
| C32-C11 | 1.4055 | C14-C16-<br>C35 | 121.07 |             |        |
| C33-C8  | 1.3986 | C14-C16-<br>H17 | 119.70 |             |        |
| O34-C32 | 1.3509 | H17-C16-<br>C35 | 119.23 |             |        |
| O34-C19 | 1.4561 | C9-C18-H41      | 120.10 |             |        |
| C35-C32 | 1.3938 | C9-C18-C39      | 119.82 |             |        |
| C35-C16 | 1.3850 | C39-C18-<br>H41 | 120.08 |             |        |
| H36-C35 | 1.0818 | H20-C19-<br>C21 | 108.57 |             |        |
| C37-C9  | 1.3858 | C6-C19-C21      | 115.67 |             |        |
| C37-C8  | 1.4013 | C6-C19-H20      | 109.54 |             |        |
| H38-C37 | 1.0814 | C21-C19-<br>O34 | 108.53 |             |        |
| C39-C33 | 1.3897 | H20-C19-<br>O34 | 102.36 |             |        |
| C39-C18 | 1.3895 | C6-C19-O34      | 111.31 |             |        |
| H40-C39 | 1.0829 | C19-C21-<br>C22 | 123.10 |             |        |
| H41-C18 | 1.0830 | C22-C21-<br>C30 | 118.86 |             |        |
| H42-C33 | 1.0812 | C19-C21-<br>C30 | 118.05 |             |        |

---



**Table 4S.** Optimized Bond distances (Å) and angles (degrees) selecting to molecule **4e**. Calculations were performed with DFT and B3LYP functional. Figure 1 shows the atom labels definition.

| Bond        | Distance (Å) | Bond             | Angle (°) |
|-------------|--------------|------------------|-----------|
| O(2)-C(3)   | 1.2895       | C(3)-O(2)-B(1)   | 120.8167  |
| O(1)-C(1)   | 1.3002       | C(1)-O(1)-B(1)   | 123.2185  |
| O(2)-B(1)   | 1.5085       | F(1)-B(1)-F(2)   | 114.2471  |
| O(1)-B(1)   | 1.5036       | F(1)-B(1)-O(1)   | 109.0227  |
| F(2)-B(1)   | 1.3784       | F(2)-B(1)-O(1)   | 108.612   |
| F(1)-B(1)   | 1.3613       | F(1)-B(1)-O(2)   | 109.1807  |
| C(3)-C(2)   | 1.4078       | F(2)-B(1)-O(2)   | 108.2181  |
| C(3)-C(4)   | 1.4498       | O(1)-B(1)-O(2)   | 107.2642  |
| C(2)-C(1)   | 1.404        | O(2)-C(3)-C(2)   | 123.2112  |
| C(2)-C(14)  | 1.5092       | O(2)-C(3)-C(4)   | 117.1626  |
| C(14)-C(15) | 1.5254       | C(2)-C(3)-C(4)   | 119.5437  |
| C(10)-S(1)  | 1.7394       | C(3)-C(2)-C(1)   | 117.5049  |
| C(10)-C(11) | 1.3828       | C(3)-C(2)-C(14)  | 117.1401  |
| C(12)-C(11) | 1.4072       | C(10)-S(1)-C(13) | 92.1963   |
| C(4)-C(9)   | 1.4041       | C(4)-C(9)-O(3)   | 121.5088  |
| C(4)-C(5)   | 1.4033       | C(4)-C(9)-C(8)   | 120.2512  |

**Table 5S.** Excitations energies (in eV and nm), Oscillator Strength (fosc), and main orbitals electronic transition calculated with full TDDFT with B3LYP/def2-TZVP for molecule **4a**. In the transitions the orbitals 96 and 97 are the HOMO and LUMO, respectively.

| State | Transition<br>( $\geq 10\%$ )                                                                 | E / eV | $\lambda$ / nm | fosc        |
|-------|-----------------------------------------------------------------------------------------------|--------|----------------|-------------|
| 1     | 96 $\rightarrow$ 97<br>(95%)                                                                  | 3.210  | 386.3          | 0.170809152 |
| 2     | 95 $\rightarrow$ 97<br>(93%)                                                                  | 3.693  | 335.7          | 0.273949741 |
| 3     | 94 $\rightarrow$ 97<br>(98%)                                                                  | 3.900  | 317.9          | 0.019052243 |
| 4     | 93 $\rightarrow$ 97<br>(95%)                                                                  | 3.914  | 316.8          | 0.117756096 |
| 6     | 91 $\rightarrow$ 97<br>(88%)                                                                  | 4.324  | 286.7          | 0.027901013 |
| 7     | 90 $\rightarrow$ 97<br>(88%)                                                                  | 4.558  | 272            | 0.033283194 |
| 9     | 96 $\rightarrow$ 98<br>(86%)                                                                  | 4.748  | 261.1          | 0.028003944 |
| 10    | 96 $\rightarrow$ 100<br>(80%)                                                                 | 5.073  | 244.4          | 0.013384248 |
| 12    | 95 $\rightarrow$ 98<br>(72%)                                                                  | 5.181  | 239.3          | 0.026443151 |
| 14    | 96 $\rightarrow$ 101<br>(68%)<br>96 $\rightarrow$ 102<br>(10%)                                | 5.333  | 232.5          | 0.022971295 |
| 15    | 88 $\rightarrow$ 97<br>(13%)<br>94 $\rightarrow$ 98<br>(28%)<br>96 $\rightarrow$ 102<br>(23%) | 5.448  | 227.6          | 0.049643849 |
| 17    | 88 $\rightarrow$ 97<br>(72%)                                                                  | 5.483  | 226.1          | 0.01321619  |
| 19    | 93 $\rightarrow$ 98<br>(34%)                                                                  | 5.590  | 221.8          | 0.036506356 |

|    |                                                                                                    |       |       |             |
|----|----------------------------------------------------------------------------------------------------|-------|-------|-------------|
|    | 94 → 98<br>(28%)                                                                                   |       |       |             |
| 22 | 87 → 97<br>(36%)<br>95 → 101<br>(34%)                                                              | 5.822 | 213   | 0.016565902 |
| 23 | 87 → 97<br>(13%)<br>91 → 98<br>(34%)<br>95 → 101<br>(13%)                                          | 5.859 | 211.6 | 0.038940285 |
| 24 | 87 → 97<br>(14%)<br>91 → 98<br>(14%)<br>93 → 100<br>(13%)<br>94 → 99<br>(12%)                      | 5.911 | 209.8 | 0.076544986 |
| 26 | 86 → 97<br>(11%)<br>87 → 97<br>(12%)<br>94 → 99<br>(22%)<br>95 → 102<br>(16%)<br>96 → 103<br>(16%) | 5.945 | 208.5 | 0.033539019 |
| 28 | 86 → 97<br>(11%)<br>93 → 99<br>(10%)<br>93 → 100<br>(13%)<br>94 → 99<br>(19%)<br>94 → 101<br>(15%) | 6.015 | 206.1 | 0.034965853 |
| 29 | 92 → 100<br>(18%)<br>93 → 99                                                                       | 6.03  | 205.6 | 0.012450534 |

|    |                                                          |       |       |             |
|----|----------------------------------------------------------|-------|-------|-------------|
|    | (18%)                                                    |       |       |             |
| 30 | 82 → 97<br>(15%)<br>86 → 97<br>(31%)<br>90 → 98<br>(10%) | 6.043 | 205.2 | 0.022034954 |

**Table 6S.** Excitations energies (in eV and nm), Oscillator Strength (fosc ), and main orbitals electronic transition calculated with full TDDFT with B3LYP/def2-TZVP for molecule **4e**. In the transitions the orbitals 97 and 98 are the HOMO and LUMO, respectively.

| State | Transition<br>(≥10%)                             | E / eV | λ / nm | fosc        |
|-------|--------------------------------------------------|--------|--------|-------------|
| 1     | 97 → 98 (93%)                                    | 3.066  | 404.4  | 0.224529310 |
| 2     | 96 → 98 (87%)                                    | 3.524  | 351.8  | 0.291237391 |
| 3     | 95 → 98 (86%)                                    | 3.671  | 337.7  | 0.105519184 |
| 4     | 94 → 98 (96%)                                    | 3.714  | 333.8  | 0.013623090 |
| 6     | 93 → 98 (20%)<br>92 → 98 (69%)                   | 4.200  | 295.2  | 0.041282564 |
| 7     | 91 → 98 (45%)<br>97 → 99 (47%)                   | 4.424  | 280.3  | 0.039450197 |
| 8     | 91 → 98 (50%)<br>97 → 99 (38%)                   | 4.453  | 278.4  | 0.016901852 |
| 10    | 96 → 99 (85%)                                    | 4.870  | 254.6  | 0.024583897 |
| 12    | 94 → 99 (45%)<br>95 → 99 (29%)<br>97 → 100 (13%) | 5.096  | 243.3  | 0.020891773 |
| 13    | 94 → 99 (18%)<br>95 → 99 (62%)<br>97 → 100 (10%) | 5.131  | 241.6  | 0.023999761 |
| 14    | 97 → 101 (82%)                                   | 5.281  | 234.8  | 0.018171715 |
| 18    | 93 → 99 (46%)<br>93 → 99 (37%)                   | 5.539  | 223.8  | 0.093964106 |

|    |                                                                     |       |       |             |
|----|---------------------------------------------------------------------|-------|-------|-------------|
| 19 | 92 → 99 (49%)<br>93 → 99 (13%)<br>96 → 100 (20%)                    | 5.572 | 222.5 | 0.046046646 |
| 20 | 91 → 99 (13%)<br>92 → 99 (16%)<br>96 → 100 (19%)<br>97 → 102 (16%)  | 5.656 | 219.2 | 0.016147459 |
| 22 | 91 → 99 (20%)<br>92 → 99 (10%)<br>96 → 101 (20%)<br>97 → 103 (24%)  | 5.770 | 214.9 | 0.012774448 |
| 23 | 91 → 99 (21%)<br>96 → 101 (12%)<br>97 → 103 (26%)<br>97 → 104 (16%) | 5.819 | 213.1 | 0.026391595 |
| 24 | 91 → 99 (23%)<br>96 → 101 (26%)<br>96 → 102 (20%)                   | 5.855 | 211.8 | 0.039512209 |
| 25 | 87 → 98 (58%)<br>97 → 104 (14%)                                     | 5.887 | 210.6 | 0.022891242 |
| 26 | 94 → 101 (15%)<br>95 → 100 (63%)                                    | 5.915 | 209.6 | 0.035918586 |
| 27 | 97 → 103 (20%)<br>97 → 104 (33%)                                    | 5.948 | 208.4 | 0.082427580 |
| 28 | 96 → 102 (44%)                                                      | 5.965 | 207.9 | 0.105858928 |
| 29 | 86 → 98 (50%)<br>87 → 98 (16%)                                      | 5.986 | 207.1 | 0.017980533 |
| 30 | 95 → 101 (25%)<br>95 → 102 (45%)                                    | 6.113 | 202.8 | 0.019074172 |

**Table 7S.** Main excited states for molecules **4a** and **4e** and their respective oscillator strength values ( $f_{osc}$ ) for different solvents calculated with B3LYP functional.

|                    | State 1 | $f_{osc}$ | State 2 | $f_{osc}$ | State 3 | $f_{osc}$ | State 4 | $f_{osc}$ |
|--------------------|---------|-----------|---------|-----------|---------|-----------|---------|-----------|
| <b>Compound 4a</b> |         |           |         |           |         |           |         |           |
| gas phase          | 386.3   | 0.171     | 335.7   | 0.274     | 317.9   | 0.019     | 316.8   | 0.118     |

|                    |       |       |       |       |       |       |       |       |
|--------------------|-------|-------|-------|-------|-------|-------|-------|-------|
| CH <sub>3</sub> CN | 433.6 | 0.139 | 387.3 | 0.174 | 420.0 | 0.002 | 346.0 | 0.253 |
| CHCl <sub>3</sub>  | 432.3 | 0.142 | 379.8 | 0.198 | 427.0 | 0.002 | 346.3 | 0.220 |
| THF                | 432.6 | 0.141 | 382.5 | 0.189 | 424.0 | 0.002 | 345.9 | 0.233 |
| <b>Compound 4e</b> |       |       |       |       |       |       |       |       |
| gas phase          | 404.4 | 0.225 | 351.8 | 0.291 | 337.7 | 0.106 | 333.8 | 0.014 |
| CH <sub>3</sub> CN | 451.3 | 0.203 | 391.7 | 0.232 | 367.0 | 0.194 | 423.5 | 0.014 |
| CHCl <sub>3</sub>  | 442.6 | 0.210 | 378.4 | 0.262 | 369.8 | 0.131 | 427.6 | 0.016 |
| THF                | 451.5 | 0.236 | 388.4 | 0.281 | 367.3 | 0.193 | 432.2 | 0.016 |
